# 1 **Opposing influence of top-down and bottom-up input on different types of** 2 **excitatory layer 2/3 neurons in mouse visual cortex**

3 Rebecca Jordan<sup>1</sup> & Georg B. Keller<sup>1,2,3</sup>

4 <sup>1</sup>*Friedrich Miescher Institute for Biomedical Research, Basel, Switzerland.*

5 <sup>2</sup>*Faculty of Natural Sciences, University of Basel, Basel, Switzerland.*

6 <sup>3</sup>*To whom correspondence should be addressed.*

## 7 **ABSTRACT**

8 **Processing in cortical circuits is driven by combinations of cortical and subcortical inputs. These signals**  
9 **are often conceptually categorized as bottom-up input, conveying sensory information, and top-down**  
10 **input, conveying contextual information. Using intracellular recordings in mouse visual cortex, we**  
11 **measured neuronal responses to visual input, locomotion, and visuomotor mismatches. We show that**  
12 **layer 2/3 (L2/3) neurons compute a difference between top-down motor-related input and bottom-up**  
13 **visual flow input. Most L2/3 neurons responded to visuomotor mismatch with either hyperpolarization**  
14 **or depolarization, and these two response types were associated with distinct physiological properties.**  
15 **Consistent with a subtraction of bottom-up and top-down input, visual and motor-related inputs had**  
16 **opposing influence in L2/3 neurons. In infragranular neurons, we found no evidence of a difference-**  
17 **computation and responses were consistent with a positive integration of visuomotor inputs. Our**  
18 **results provide evidence that L2/3 functions as a bidirectional comparator of top-down and bottom-up**  
19 **input.**

## 20 **INTRODUCTION**

21 Learning the relationship between body movements and the resulting sensory feedback is one of the  
22 fundamental tasks that the nervous system performs. Predicting the sensory consequences of self-motion  
23 is a central component of feedback guided motor control and allows the brain to infer whether sensory  
24 stimuli are self-generated or externally generated (Crapse and Sommer, 2008). Exactly how the nervous  
25 system learns and represents the relationships between movement and sensory feedback, however, is  
26 still unclear. One of the brain structures critically involved in more complex forms of sensorimotor learning  
27 is neocortex. A ubiquitous feature of cortical areas is that they receive both bottom-up sensory-driven  
28 input, and top-down input that is thought to signal contextual and motor information. The primary visual  
29 cortex of mice receives both bottom-up visual input from the lateral geniculate nucleus, as well as top-

30 down input from a variety of other cortical areas, including higher order visual cortices, retrosplenial  
31 cortex and anterior cingulate cortex. These top-down inputs have been shown to convey various non-  
32 visual types of information, including eye-movement related signals (McFarland et al., 2015), spatial  
33 information (Fiser et al., 2016; Saleem et al., 2018), head-direction (Vélez-Fort et al., 2018), and  
34 locomotion-related signals (Leinweber et al., 2017). Integrating movement-related input with visual input  
35 could allow the cortex to make an accurate inference about how the animal is moving through the world.

36 There are different ideas about the computational purpose of integrating bottom-up and top-down  
37 inputs. One idea is that the top-down input associated with locomotion may function to increase the  
38 signal-to-noise ratio of visual responses. This was based on the finding that locomotion results in an  
39 increase of visual responses (Niell and Stryker, 2010), as well as a general increase in membrane potential  
40 (Bennett et al., 2013; Polack et al., 2013). Neuromodulatory inputs are more active during locomotion  
41 (Larsen et al., 2018), with cortex-wide changes in extracellular potassium (Rasmussen et al., 2019),  
42 indicating that there is a locomotion-related state change within and across cortical circuits that is likely  
43 to underlie this increased gain of visual responses (Fu et al., 2014; Polack et al., 2013). A second idea is  
44 that V1 may integrate positively weighted sums of locomotion speed and visual flow speed to estimate  
45 an animal's speed through the world (Saleem et al., 2013). This was based on the finding that neurons in  
46 V1 can also be driven in complete absence of visual input in the dark (Keller et al., 2012) and often have  
47 activity that correlates positively with both visual flow speed and locomotion speed (Saleem et al., 2013).  
48 Another idea is that layer 2/3 (L2/3) neurons use a difference between bottom-up visual input and a top-  
49 down prediction to compute visuomotor prediction errors (Keller and Mrcic-Flogel, 2018). This was based  
50 on the finding that a subset of L2/3 neurons strongly respond to a sudden mismatch between visual flow  
51 feedback and locomotion speed (Keller et al., 2012; Zmarz and Keller, 2016). This last interpretation is at  
52 the core of the framework of predictive processing. One of the key features of this model are prediction-  
53 error neurons, which receive two sources of input: top-down inputs that convey a prediction of sensory  
54 input, and bottom-up inputs that carry sensory-driven information. By comparing these inputs, prediction  
55 error neurons are responsive to differences between the two. To do this, top-down and bottom-up inputs  
56 could be compared using a divisive mechanism (Spratling, 2008; Spratling et al., 2009), or by a subtractive  
57 mechanism (Keller and Mrcic-Flogel, 2018; Rao and Ballard, 1999). A subtractive mechanism would predict  
58 that in any given neuron the weights of two types of input are opposing. If bottom up sensory input is  
59 excitatory, the top down input should be inhibitory, and vice versa.

60 The predictive processing framework postulates the existence of two types of prediction error neurons:  
61 positive prediction error neurons that subtract a top-down prediction from the sensory input, and  
62 negative prediction error neurons that subtract sensory input from the top-down prediction (Keller and  
63 Mrsic-Flogel, 2018; Rao and Ballard, 1999). The mismatch-responsive neurons found in L2/3 using calcium  
64 imaging are consistent with the latter type of neurons. Visual cortex receives bottom-up excitation and  
65 visually driven bottom-up inhibition (Attinger et al., 2017), as well as a diverse combination of excitatory  
66 and inhibitory top-down inputs (Gilbert and Li, 2013; Leinweber et al., 2017; Zhang et al., 2014). If the  
67 strengths of the two sources of input were balanced and opposing in individual L2/3 excitatory neurons,  
68 prediction error responses would arise simply as a result of a temporary imbalance between the two  
69 inputs.

70 To test for the existence of a balance between top-down and bottom-up input in L2/3 and infragranular  
71 neurons, we performed intracellular recordings in visual cortex of mice exploring a virtual reality  
72 environment. We show that there are two types of responses to visuomotor mismatch in L2/3 excitatory  
73 neurons: hyperpolarizing and depolarizing. These two response types are associated with differences in  
74 electrophysiological properties, visual responses, and membrane potential dynamics during locomotion  
75 indicating they may be different neuron types. Moreover, the sign of the response to visual input and the  
76 sign of the response to locomotion-related input was inversely related, consistent with L2/3 computing a  
77 difference between the two inputs. By contrast, deep layer neurons did not show this characteristic,  
78 instead exhibiting positive signs of responses to both types of input. Thus, we demonstrate layer and  
79 neuron-type specific integration of sensory and motor-related inputs.

## 80 **RESULTS**

81 To assess subthreshold responses to visuomotor mismatch, we made blind whole cell recordings in visual  
82 cortex of awake mice, head-fixed on a spherical treadmill with locomotion coupled to visual flow feedback  
83 in a virtual reality environment (**Figure 1A**) (Leinweber et al., 2014). To ensure sufficient levels of  
84 locomotion during recording experiments, mice were habituated to this paradigm in several sessions prior  
85 to whole cell recordings (**Figure 1B**). During each whole cell recording experiment, the mouse first  
86 experienced full-field visual flow that was coupled to its locomotion. The coupling of visual flow to  
87 locomotion was interrupted by suddenly halting visual flow for 1 s at random times to generate  
88 visuomotor mismatch events (Keller et al., 2012). Subsequently, we decoupled locomotion and visual  
89 stimuli to measure the independent contributions of locomotion and visual flow on neuronal activity.

90 Visual stimuli consisted of full-field, fixed-speed flow of the virtual tunnel walls, presented at random  
91 times for 1s, regardless of the mouse's locomotion behavior. We made whole cell recordings from a total  
92 of 54 neurons. We focused our analysis on putative excitatory neuron types by excluding neurons with  
93 high input resistance (greater than 100 M $\Omega$ ), as well as neurons with a spike half-width below 0.6 ms  
94 (Gentet et al., 2012; Pala and Petersen, 2015). By doing this, we excluded 15% of neurons in total, leaving  
95 46 putative excitatory neurons in the sample (**Figure S1A-C**). We then restricted the dataset to 32 putative  
96 L2/3 excitatory neurons by analyzing only neurons recorded at less than 400  $\mu$ m vertical depth from the  
97 brain surface.

### 98 **Subthreshold mismatch responses are widespread in putative L2/3 excitatory neurons and distinguish** 99 **different neuron types**

100 We first assessed the responses of putative L2/3 excitatory neurons to visuomotor mismatch ( $15 \pm 10$   
101 (mean  $\pm$  standard deviation) mismatch presentations per neuron). Consistent with mismatch responses  
102 described previously using calcium imaging, we found neurons with clear depolarizing responses to  
103 visuomotor mismatch stimuli (**Figure 1C and 1D**). The strengths of these responses were often correlated  
104 with the running speed of the mouse immediately preceding the mismatch event (**Figures 1E- and 1F, S1D**  
105 **and S1E**), with the depolarization becoming stronger with faster locomotion speeds. This is congruent  
106 with the responses reflecting the degree of error between running speed and visual flow speed, and  
107 consistent with the responses found using calcium imaging (Zmarz and Keller, 2016).

108 In total, 17 of 32 neurons significantly responded with at least 1 mV average depolarization and 6 of 32  
109 neurons responded with at least 1 mV hyperpolarization to visuomotor mismatch (**Figures 2A-C**). We will  
110 refer to these neurons as depolarizing mismatch (dMM) neurons and hyperpolarizing mismatch (hMM)  
111 neurons respectively. The remaining neurons (9 of 32) did not exceed the average 1 mV threshold but  
112 were not unresponsive and often showed brief depolarizing responses at the onset and/or the offset of  
113 mismatch. Spiking responses were less common, with only 3 of 32 neurons displaying more than 0.25  
114 spikes per mismatch stimulus on average (**Figure 2D**). Supporting the idea that hMM and dMM neurons  
115 are different neuron types driven by different input pathways, we found that electrophysiological  
116 properties differed between dMM and hMM neurons. dMM neurons had more depolarized resting  
117 membrane potentials (mean  $\pm$  SD, dMM:  $-77.7 \pm 7.2$  mV, hMM:  $-90.4 \pm 3.7$  mV,  $p < 0.01$ , Student's t-test;  
118 **Figure 2E**), more depolarized spike thresholds (mean  $\pm$  SD, dMM:  $-34.7 \pm 4.4$  mV, hMM:  $-41.1 \pm 2.1$  mV;  $p$   
119  $< 0.05$ , Student's t-test; **Figure 2F**) and lower spike rates than hMM neurons (dMM: median spike count =  
120 0, IQR = 0 to 0.0008 spikes; hMM: median spike count = 0.05, inter-quartile range (IQR) = 0 to 0.11 spikes;

121  $p < 10^{-7}$ , Brown-Forsythe test;  $p < 0.03$ , Wilcoxon rank sum test; **Figure 2G**). We found no significant  
122 differences in input resistances or membrane time constants between the two groups (**Figure S2**),  
123 however, using multiple linear regression involving five variables (input resistance, membrane time  
124 constant, resting membrane potential, baseline firing rate and membrane potential variance when  
125 stationary), we could explain almost 70% of the variance in mismatch responses ( $R^2 = 0.68$ ,  $p < 0.001$ , 23  
126 neurons). Thus, most L2/3 neurons responded to visuomotor mismatches, and the sign of this response  
127 to mismatch correlates with differences in electrophysiological properties.

### 128 **Mismatch responses are anticorrelated with visual flow responses in putative L2/3 excitatory neurons**

129 The observed mismatch responses either could be computed in L2/3 neurons or could be inherited from  
130 other layers in visual cortex, or from other brain regions that provide input to L2/3 visual cortex neurons.  
131 If they are computed locally and arise from a reduction in bottom-up visually driven input, we would  
132 expect to see an opposing relationship between the sign of the mismatch response and that of the  
133 response to visual flow. If the bottom-up visual input is depolarizing, mismatch responses should be  
134 hyperpolarizing, and vice versa. To examine this, we analyzed the responses of all neurons to visual input  
135 in the form of brief periods of visual flow, presented independently from locomotion. Since the visual flow  
136 responses during locomotion and during stationary periods were correlated (**Figure S3**), we included all  
137 presentations in our analysis in order to maximize trial number. Of the 32 putative L2/3 we lost 5 neurons  
138 before being able to record visual responses. Consistent with an opposing response to mismatch and  
139 visual input, we found that on average dMM neurons responded to these visual flow stimuli with a  
140 hyperpolarization (**Figure 3A-C**), while hMM neurons responded to visual flow stimuli with depolarization  
141 (**Figure 3C**). Of 27 neurons recorded, only 3 exhibited spiking responses to visual stimuli and were all hMM  
142 neurons. The subthreshold response difference to visual input was significantly different in dMM and  
143 hMM neurons (mean  $\pm$  SD, dMM:  $-0.26 \pm 1.57$  mV,  $n = 14$ ; hMM:  $3.42 \pm 2.91$  mV,  $n = 5$ ;  $p < 0.003$ , Student's  
144 t-test; **Figure 3D**). Across all neurons, we found a significant negative correlation between visual flow  
145 response and mismatch response ( $R = -0.50$ ,  $p < 0.01$ ,  $n = 27$ , **Figure 3E**).

146 In addition to responses to visual flow onset, we found that many neurons also exhibited depolarizing  
147 responses or persisting depolarization after visual flow offset (**Figure 3C**). One interpretation of this is that  
148 the offset of visual flow results in separate excitatory input to L2/3 neurons. Consequently, mismatch  
149 responses would be a combination of the reduction of a bottom-up input correlated with visual flow and  
150 a parallel increase in input driven by the visual flow reduction. Correcting the mismatch responses for this  
151 visual flow offset response revealed an almost perfect balance between opposing visually driven

152 responses and mismatch responses across the population of L2/3 neurons ( $R = -0.84$ ,  $p < 10^{-7}$ ,  $n = 27$ ;  
153 **Figure 3E**; see Methods).

154 In a subset of neurons, we tested the effect of varying the visual flow speed and presented four distinct  
155 visual flow speeds (**Figure 3F**). For dMM neurons, visually driven hyperpolarization scaled with visual flow  
156 speed, resulting in negative correlations between visual flow speed and membrane potential response  
157 (mean  $R$  value  $\pm$  SD, =  $-0.54 \pm 0.21$ ,  $n = 6$ ) (**Figure 3G**). By contrast, in hMM neurons the correlation of  
158 visually driven depolarization with visual flow speed was positive, consistent with an excitatory bottom-  
159 up input correlated with visual flow speed (mean  $R$  value  $\pm$  SD =  $0.1 \pm 0.1$ ,  $n = 4$ ; dMM vs hMM:  $p < 0.003$ ,  
160 Student's  $t$ -test). This balance between opposing visual and mismatch responses is consistent with  
161 mismatch responses arising from transient removal of bottom-up visual input.

### 162 **The influence of locomotion on membrane potential differs depending on mismatch response**

163 Computing visuomotor prediction errors requires a top-down input to convey a prediction of visual flow  
164 given movement. A potential source for such a top-down input to V1 is A24b/M2 (Leinweber et al., 2017).  
165 If this were the case, we would expect to find a motor-related input to a given neuron whose strength is  
166 correlated with the strength of the mismatch responses and anti-correlated with the strength of visual  
167 response. Thus, dMM neurons should receive motor-related excitation, while hMM neurons should  
168 receive motor-related inhibition (Keller and Mrsic-Flogel, 2018). Complicating this is the fact that  
169 locomotion is associated with a brain state change, likely driven by neuromodulatory inputs (Fu et al.,  
170 2014; Polack et al., 2013). We first analyzed the membrane potential changes driven by locomotion and,  
171 consistent with previous work, found a systematic change in both mean membrane potential ( $V_m$ ) and  
172 variance (**Figures 4A-C and S4**) (Bennett et al., 2013; Polack et al., 2013). The membrane potential became  
173 more depolarized (mean  $\pm$  SD,  $\Delta V_m = 4.5 \pm 2.5$  mV,  $p < 10^{-10}$ , 39 neurons, paired  $t$ -test) and less variable  
174 (mean  $\pm$  SD,  $\Delta V_m$  SD =  $-1.8 \pm 1.5$  mV,  $p < 10^{-8}$ , paired  $t$ -test) during locomotion, with only a small change in  
175 spike rates (mean  $\pm$  SD,  $\Delta FR = 0.11 \pm 0.65$  Hz,  $p = 0.31$ , paired  $t$ -test). Quantifying the membrane potential  
176 changes driven by locomotion onset in absence of coupled visual flow in the open loop condition, we  
177 found that all neurons displayed locomotion-related depolarization of membrane potential that began  
178 prior to locomotion onset (**Figure 4C**). This is consistent with locomotion onset responses observed in  
179 suprathreshold responses in V1 (Keller et al., 2012; Saleem et al., 2013), and is likely caused by  
180 neuromodulatory input (Polack et al., 2013). We also found that locomotion caused visual responses to  
181 become significantly more depolarizing (**Figure S3**), consistent with previous findings (Bennett et al.,  
182 2013). Although both dMM and hMM neurons both depolarized during locomotion, locomotion onset

183 responses correlated positively with mismatch responses (**Figure 4E**). These results are consistent with a  
184 neuromodulatory state change causing widespread depolarization of neurons, alongside a separate  
185 locomotion-related drive that correlates with mismatch response. To better separate the effects of the  
186 state change from a potential direct locomotion-related drive, we analyzed the correlation between  
187 membrane potential and locomotion speed of the mouse only during times of locomotion, to minimize  
188 the influence of state transitions associated with locomotion on- and offsets (see Methods; **Figure S6**).  
189 When comparing responses in hMM and dMM neurons restricted to times of locomotion, we found that  
190 dMM neurons depolarized with increasing locomotion speed, while hMM neurons hyperpolarized with  
191 increasing locomotion speed (dMM: mean R value  $\pm$  SD =  $0.14 \pm 0.13$ , n = 12; hMM:  $-0.06 \pm 0.07$ , n = 5; p  
192 < 0.005, Student's t-test; **Figure 4E**). This would be consistent with a locomotion-related excitation onto  
193 dMM neurons and a locomotion-related inhibition onto hMM neurons that both scale with locomotion  
194 speed, in addition to the state-dependent depolarization. Lastly, if mismatch responses are the result of  
195 opposing visual flow and locomotion speed inputs, the correlation of the membrane potential with  
196 locomotion and that of membrane potential with visual flow speed should have opposite sign. This was  
197 indeed the case, the membrane potential of dMM neurons exhibited negative correlations with visual  
198 flow and positive correlations with locomotion speed, and the opposite was true in hMM neurons (**Figures**  
199 **4F and S6**). Consistent with a balance of two opposing inputs, we found that in both hMM and dMM  
200 neurons the timing of the peak cross-correlation of membrane potential with locomotion and was well  
201 matched with that of the cross-correlation of membrane potential with visual flow. These data are  
202 consistent with L2/3 mismatch-responsive neurons computing a comparison between a visual flow input  
203 and a locomotion related input using balanced and opposing excitatory and inhibitory input.

#### 204 **Infragranular layers positively integrate visual and motor-related input differently from L2/3**

205 Based on physiological and anatomical characteristics, it has been suggested that infragranular layers 5  
206 and 6 (L5/6) neurons perform a computational function different from L2/3 neurons. L5 neurons, for  
207 example, are strongly and broadly interconnected and appear to employ a dense firing code, while L2/3  
208 are more weakly interconnected, fire sparsely and exhibit more prominent lateral inhibition (Harris and  
209 Mrsic-Flogel, 2013). To examine whether mismatch responses are computed in a layer-specific fashion,  
210 we compared the L2/3 responses to those of neurons recorded at a depth of between 480 and 750  $\mu$ m  
211 from the brain surface (**Figure 5A**), which we will consider putative L5/6 neurons (n = 14). The  
212 electrophysiological properties of these neurons differed from those of L2/3 neurons: L5/6 neurons had  
213 significantly higher input resistances, lower spike thresholds, and tended to spike more than L2/3 neurons

214 **(Figure S5)**. These differences are consistent with those previously found between L5 and L2/3 in  
215 neocortex (De Kock and Sakmann, 2009; Lefort et al., 2009; Sakata and Harris, 2009). We next analyzed  
216 the responses of L5/6 neurons to visuomotor mismatch (**Figures 5B and 5C**). In stark contrast to L2/3  
217 neurons, depolarizing responses to mismatch were rare in L5/6 (2 of 14 neurons), while half of the neurons  
218 (7 of 14) showed a hyperpolarizing response (**Figure 5D**). This resulted in a significant difference between  
219 average mismatch responses in L2/3 and L5/6 (mean  $\pm$  SD, L2/3:  $0.8 \pm 2.4$  mV, 32 neurons; L5/6:  $-1.3 \pm 2.2$   
220 mV, 14 neurons;  $p < 0.01$ ; Student's t-test; **Figures 5E and 5F**). This paucity of depolarizing mismatch  
221 responses in L5/6 could be the result of a) a reduced bottom-up visual inhibition, b) reduced excitatory  
222 locomotion-related input, c) a lack of balanced and opposing tuning between these two sources of input,  
223 or d) any combination of the above. To examine these possibilities, we analyzed visual flow responses and  
224 found that most L5/6 neurons exhibited depolarizing responses to visual flow stimuli (**Figure 5G**). The  
225 distribution of average visual responses did not significantly differ from that of L2/3 neurons (mean  $\pm$  SD,  
226 L2/3:  $1.3 \pm 2.8$  mV, 27 neurons; L5/6:  $2.0 \pm 1.9$  mV, 13 neurons;  $p = 0.47$ , Student's t-test; **Figures 5H and**  
227 **5I**), although hyperpolarizing visual responses did not occur in L5/6 neurons (L2/3: 26%, L5/6: 0%). Next,  
228 we looked at locomotion onset responses in L5/6 neurons. As with L2/3 neurons, nearly all L5/6 neurons  
229 underwent a depolarization at locomotion onset (**Figures 5J and 5K**) and displayed similar changes in  
230 membrane potential dynamics (**Figure 5L**). However, on average this depolarization was smaller in L5/6  
231 neurons than that of L2/3 neurons (mean  $\pm$  SD, L2/3:  $3.6 \pm 2.3$  mV; L5/6:  $2.0 \pm 2.7$  mV;  $p = 0.09$ , Student's  
232 t-test; **Figure 5L**). We also found that locomotion had distinct effects on the visual response in L5/6 versus  
233 L2/3 neurons: while locomotion caused visual responses to be more depolarizing in L2/3 neurons, there  
234 was no consistent effect in L5/6 neurons (**Figure 5S**), similar to findings in somatosensory cortex (Ayaz et  
235 al., 2019). Finally, we compared how the membrane potential in L5/6 neurons scaled with locomotion  
236 speed and visual flow speed. Unlike for L2/3 neurons, the membrane potential correlated positively with  
237 visual flow speed and locomotion speed for most L5/6 neurons (10 of 12 **Figures 6A and 5S**). Plotting the  
238 correlation of membrane potential with visual flow against that of membrane potential with locomotion  
239 speed for each neuron, we found a significant anticorrelation between these values in the L2/3 population  
240 ( $R = -0.67$ ,  $p < 0.001$ , 22 neurons; **Figure 6A**). In the L5/6 population we found no significant correlation,  
241 with most neurons in the top right quadrant of positive correlation with both visual flow speed and  
242 locomotion speed ( $R = -0.26$ ,  $p = 0.42$ , 12 neurons). Representing each neuron as an angle based on the  
243 two correlation values, we found that L2/3 showed a significantly higher proportion of neurons with  
244 angles corresponding to opposing signs of correlation (90-180 degrees and 270-360 degrees) than L5/6  
245 neurons (L2/3: 17 of 22 neurons; L5/6: 2 of 12 neurons;  $p=0.001$ , Fisher's exact test; **Figure 6B**). The



246 distribution of these angles for L2/3 and L5/6 neurons were significantly more anticorrelated than  
247 expected by chance ( $p < 0.02$ , see Methods). Across neurons, the difference between the correlation of  
248 membrane potential with locomotion and the correlation of membrane potential with visual flow was a  
249 good predictor of mismatch responses in L2/3 ( $R = 0.59$ ,  $p < 0.01$ ), but not in L5/6 ( $R = -0.06$ ,  $p = 0.84$ )  
250 (Figure 6C). Thus, the absence of depolarizing mismatch responses in L5/6 neurons is likely a result of a  
251 combination of a reduced bottom-up inhibition, and a lack of a balanced and opposing tuning between  
252 visual and locomotion related inputs. In sum, widespread, strong mismatch responses and the opposing  
253 visual and motor-related inputs necessary to compute them are a specific feature of L2/3 and are absent  
254 in L5/6 neurons, indicative of separate computational roles of L2/3 and L5/6 in visuomotor integration.

## 255 DISCUSSION

256 A canonical feature of cortical circuits is the pattern of long-range inputs that is conceptually often divided  
257 into two types of input: bottom-up and top-down. Bottom-up input originates in thalamus and areas  
258 thought to be at a lower level in a local hierarchy of cortical areas and generally conveys sensory  
259 information from the periphery. Top-down input originates from areas at a higher level of a local cortical  
260 hierarchy and is thought to provide contextual information and underlie phenomena such as selective  
261 attention (Busse et al., 2017; Engel et al., 2001; Makino and Komiyama, 2015; Zhang et al., 2014). In some  
262 computational frameworks, top-down inputs are thought to convey a prior or prediction of bottom-up  
263 input. In the predictive processing framework, top-down predictions are thought to be subtracted from  
264 bottom-up input to compute bidirectional prediction errors that are used to update an internal  
265 representation (Keller and Mrsic-Flogel, 2018; Rao and Ballard, 1999). By probing intracellular voltage  
266 responses to visuomotor mismatches we found that putative L2/3 excitatory neurons fall into different  
267 response classes consistent with either bottom-up or top-down excitatory drive. These neurons exhibit a  
268 visual flow input of matching strength and opposite sign of motor-related input, consistent with a  
269 subtractive prediction-error computation in L2/3. This was not a feature of L5/6 neurons, which largely  
270 displayed hyperpolarizing responses to mismatch and appeared to integrate positive valued locomotion-  
271 related and visual inputs. These results are consistent with a model of visual cortex in which L2/3  
272 generates sensorimotor prediction errors, and L5/6 integrates L2/3 input to update an internal  
273 representation of the world (Keller and Mrsic-Flogel, 2018; Rao and Ballard, 1999).

274 A classic example of prediction errors can be found in the dopaminergic reward system. Here, reward  
275 prediction errors are thought to be encoded bidirectionally in individual neurons with increases and

276 decreases in firing rate corresponding to a positive or negative prediction error (Schultz et al., 1997). In  
277 our recordings, at least two kinds of mismatch response are distinguishable in L2/3: those that  
278 hyperpolarize and those that depolarize during mismatch. These neurons also show distinct visual  
279 responses, relationships between membrane potential and locomotion speed, and electrophysiological  
280 properties. These two neuron types could correspond to positive and negative prediction error neurons,  
281 which signal that the sensory input is higher or lower than predicted, respectively. Splitting prediction  
282 error responses into two separate populations of neurons is necessary when baseline firing rates are low,  
283 as they are in L2/3 neurons.

284 What fraction of neurons that respond to mismatch would we expect to find assuming the predictive  
285 processing framework were a useful model? A simple upper bound on this would be at most half of the  
286 prediction error neuron population, half responds to positive prediction errors, the other half to negative  
287 prediction errors. However, this assumes that we are probing the entire space of all visual prediction  
288 errors represented in V1. In our experiments, we probe prediction errors by breaking the coupling  
289 between forward locomotion and backward visual flow. This represents only a small fraction of total space  
290 of visuomotor coupling a mouse will experience. V1 receives top-down input that conveys predictions of  
291 visual input given locomotion (Leinweber et al., 2017), spatial location (Fiser et al., 2016), and visual  
292 surround (Keller et al., 2020). In addition, V1 receives inputs that convey vestibular signals (Vélez-Fort et  
293 al., 2018) and auditory signals (Ibrahim et al., 2016; Iurilli et al., 2012). In principle, all of these top-down  
294 inputs could be associated with a population of prediction error neurons selective for the particular type  
295 of error. Suggestive of this is the finding that L2/3 neurons that respond to the omission of a visual input  
296 a mouse expects to see based on spatial location are different from those that respond to mismatch (an  
297 absence of visual flow expected based on forward locomotion) (Fiser et al., 2016). Thus, one would not  
298 expect all prediction error neurons to respond to a single type of prediction error. Using extracellular  
299 recordings across the entire cortical depth likely dominated by infragranular responses, a previous study  
300 found that only 5 of 73 neurons were selective for the difference between visual speed and locomotion  
301 speed (Saleem et al., 2013). The fraction of L2/3 neurons estimated to respond to visuomotor mismatch  
302 events based on calcium imaging is in the range of 20% to 30% (Attinger et al., 2017; Keller et al., 2012).

303 Each neuron likely has some tuning that relates to the top-down input distribution conveying the  
304 prediction used to compute the prediction error. This tuning would be reflected in a graded subthreshold  
305 response to one particular type of prediction error as a result of balanced bottom-up and top-down input,  
306 independent of whether the neuron has a spiking response to that particular prediction error (**Figure 6D**).

307 Consequently, one would expect to find that negative prediction error neurons are net bottom-up  
308 inhibited and top-down excited, and vice versa for positive prediction error neurons. We do indeed find  
309 that about half of the L2/3 neurons exhibit depolarizing mismatch responses consistent with a negative  
310 prediction error input balance. The question remains as to why we find an underrepresentation of  
311 neurons that are bottom-up excited and top-down inhibited. This is likely a consequence of the fact that  
312 we used mismatch responses, a negative prediction error, to classify the neurons. Using the unbiased  
313 measure of correlation with visual flow and locomotion (**Figure 6B**), we find a more symmetric split  
314 between the two types of responses. Testing the model proposed in the predictive processing framework  
315 will require addressing the question of whether L2/3 neurons that do not exhibit spiking responses in this  
316 paradigm, would code for a different kind of prediction error.

317 In sum, we show that visual and locomotion-related inputs to L2/3 neurons in visual cortex underlie  
318 visuomotor mismatch signals, and that this computation is likely specific to L2/3. In addition, we find that  
319 there are two functional types of neurons whose responses are consistent with signaling either positive  
320 or negative prediction errors. We speculate that L5/6 neurons integrate over prediction error inputs by  
321 being net inhibited by dMM neurons and net excited by hMM neurons. It is conceivable that the two  
322 functional neuron types in L2/3 are associated with different gene expression profiles. Identifying such  
323 markers would allow us to test the hypotheses put forward in the predictive processing framework.

324 **FIGURES**

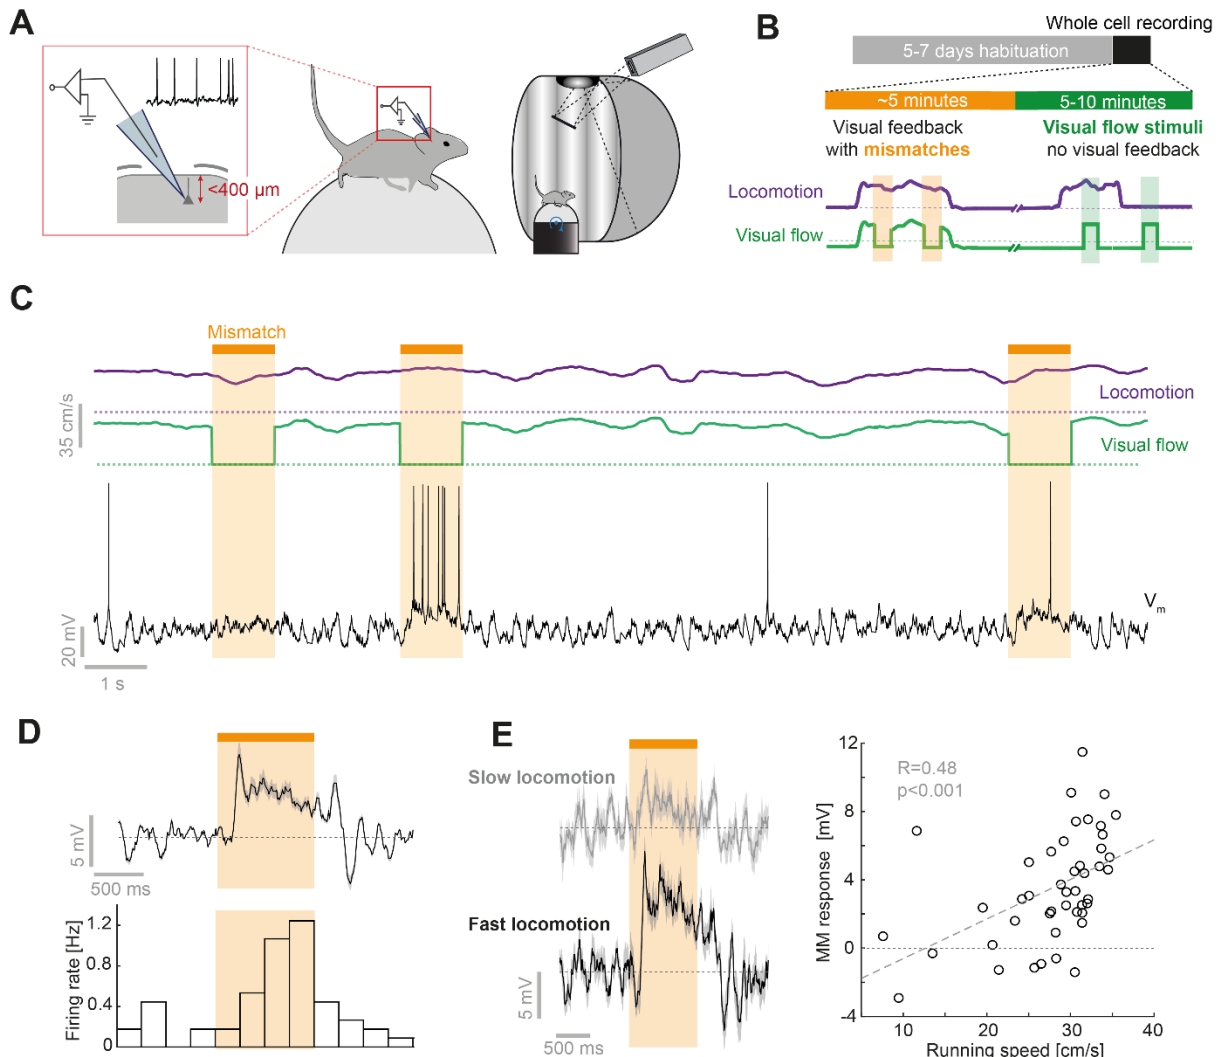

325

326 **Figure 1. Whole cell recordings during visuomotor coupling and mismatch.**

327 **(A)** Schematic of whole cell recordings at L2/3 depth and of the visuomotor virtual reality set up.

328 **(B)** Mice were habituated on the setup for 5 to 7 days before whole cell recording experiments.  
329 Experiments consisted of an initial closed-loop phase, during which visual flow feedback was coupled to  
330 the mouse's locomotion interspersed with sudden unpredictable visual flow halts (mismatches). In a  
331 second phase, visual flow was presented in 1 s pulses of visual flow independent of locomotion.

332 **(C)** Top: Locomotion (purple) and visual flow (green) speeds during a visuomotor closed-loop session.  
333 Dashed lines mark zero speed. Visuomotor mismatch events are marked by an orange bar and shading.  
334 Bottom: Example membrane potential trace from a depolarizing mismatch (dMM) neuron.

335 **(D)** Average membrane potential response (top) and firing rate (bottom) histogram for mismatch trials for  
336 example neuron shown in **C** (average over 45 mismatch events). Shading indicates SEM.

337 **(E)** Left: Average membrane potential response for the 10 mismatch events with highest locomotion  
338 speed (black) and the 10 mismatch events with lowest locomotion speed (gray), for the example neuron  
339 shown in **C**. Shading indicates SEM. Right: Scatter plot between average locomotion speed in 2 s prior to  
340 mismatch and membrane potential response to mismatch for 45 trials recorded in example neuron shown  
341 in **C**. Dashed gray line shows a linear regression.

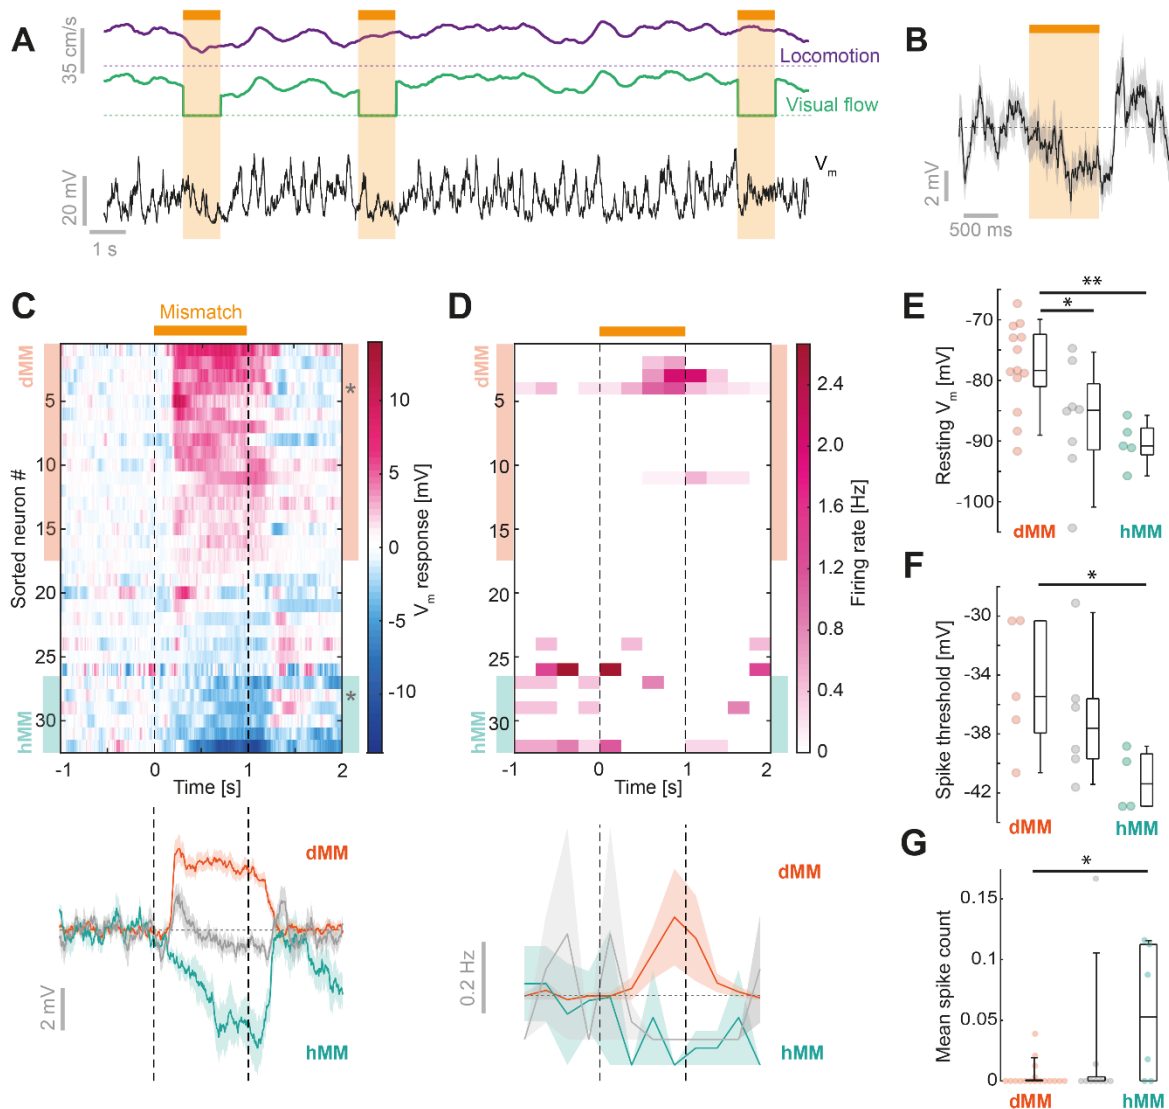

342

343 **Figure 2. Subthreshold mismatch responses are widespread in L2/3 and the direction of response**  
 344 **correlates with electrophysiological properties.**

345 **(A)** Locomotion (purple), visual flow (green) and membrane potential (black) traces from a neuron with a  
 346 hyperpolarizing response to mismatch. Dotted lines indicate 0 cm/s for visual flow (green) and locomotion  
 347 (purple). Mismatch events are marked by an orange bar and shading.

348 **(B)** Average membrane potential response to mismatch for the example neuron in **A**. Shading indicates  
 349 SEM over 15 trials.

350 **(C)** Top: Heatmap of average membrane potential ( $V_m$ ) responses to mismatch from all L2/3 neurons.  
 351 Neurons are sorted by average mismatch response. Neurons classified as depolarizing mismatch (dMM)  
 352 and hyperpolarizing mismatch (hMM) are marked by orange and turquoise shading respectively. Bottom:  
 353 Average response across 17 dMM neurons (orange), 6 hMM neurons (turquoise), and the remaining 9  
 354 unclassified neurons (gray). Asterisks indicate example neurons shown in panel **A**, and **Figure 1A**.

355 **(D)** Top: Heatmap of average firing rate during mismatch. Color coding and sorting as in **C**. Bottom:  
356 Average mismatch induced change spike count for the same groups of neurons as in **C**.

357 **(E)** Resting membrane potential recorded just after entering whole cell recording mode for 5 hMM  
358 neurons, 13 dMM neurons, and 8 unclassified neurons. \*:  $p < 0.05$ , \*\*:  $p < 0.01$ , Student's t-test. Box plots  
359 show median, quartiles, and range excluding outliers.

360 **(F)** As in **E**, but for spike threshold. Note, only neurons with spontaneous spikes were included. \*:  $p < 0.05$ ,  
361 Student's t-test.

362 **(G)** As in **E**, but for baseline spike count in a window 2 s prior to mismatch onset. \*:  $p < 0.05$ , Wilcoxon  
363 rank sum test.

364

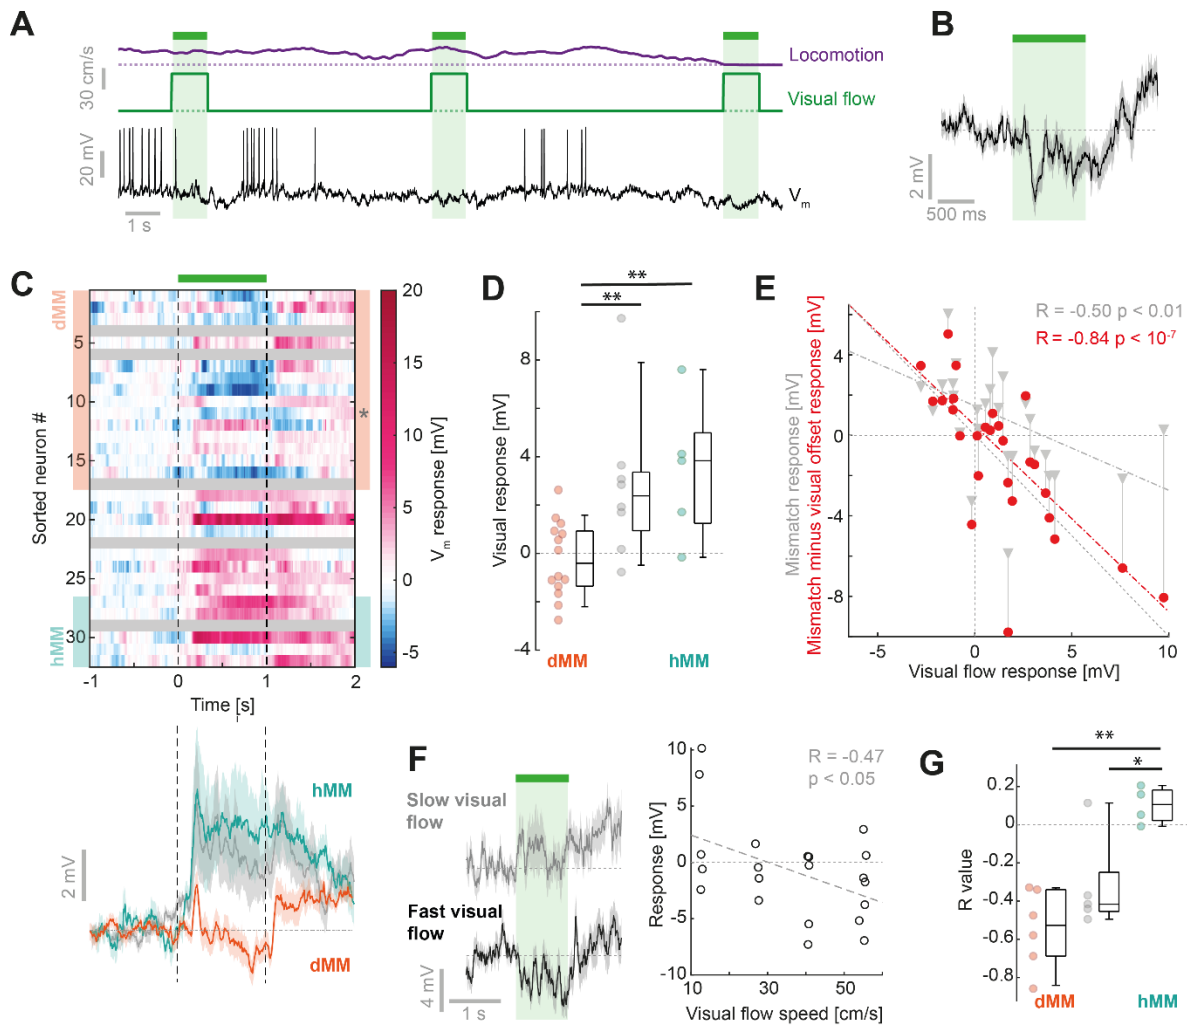

365

366 **Figure 3. Visual flow responses inversely relate to mismatch responses in L2/3 neurons.**

367 **(A)** Example membrane potential trace (black) recorded from a dMM neuron during visual flow  
 368 presentations. Brief 1 s visual flow stimuli (shaded green) evoked hyperpolarization. Locomotion is shown  
 369 in purple.

370 **(B)** Average membrane potential response to visual flow stimuli for the example neuron in **A**. Gray shading  
 371 indicates SEM over 42 trials.

372 **(C)** Top: Heatmap of average membrane potential response to full-field visual flow stimuli across of 27  
 373 L2/3 neurons. Responses are sorted according to mismatch response, as in **Figure 2C**. Gray shading marks  
 374 neurons for which we did not have sufficient data in the open-loop condition. Bottom: Average response  
 375 across 17 dMM neurons (orange), 6 hMM neurons (turquoise), and the remaining 9 neurons (gray).  
 376 Asterisk indicates example neuron shown in panel **A**.

377 **(D)** Average  $V_m$  responses to 1 s visual flow, compared for 5 hMM, 14 dMM, and 8 unclassified neurons.  
 378 \*\*:  $p < 0.01$ , Student's t-test.



379 **(E)** Scatter plot between average visual response and average mismatch response (gray triangles) for 27  
380 neurons. For red data points, mismatch responses are corrected for visual flow offset responses by  
381 subtracting the average response to visual flow offset from the mismatch response. Dashed gray and red  
382 lines are linear fits to the respective data.

383 **(F)** Left: Average response to visual flow stimuli of lowest two visual flow speeds (gray, 7 trials), and  
384 highest two speeds (black, 11 trials) for an example neuron. Shading indicates SEM over trials. Right:  
385 Scatter plot between visual flow speed and membrane potential response to visual flow for 18 trials of  
386 the example neuron.

387 **(G)** Correlation coefficients between visual flow speed and membrane potential response compared for 6  
388 hMM neurons, 4 dMM neurons and 5 unclassified neurons. \*:  $p < 0.05$ , \*\*:  $p < 0.01$ , Student's t-test.

389

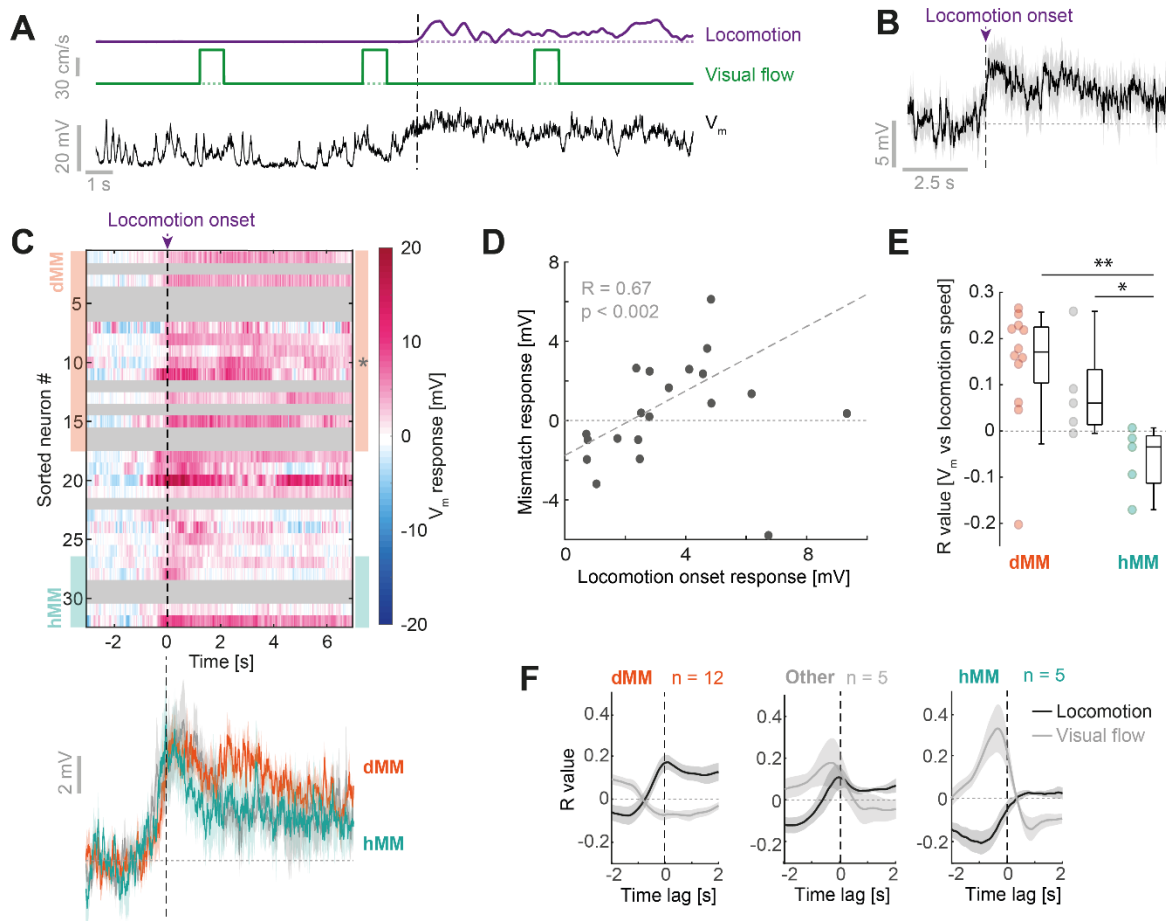

390

391 **Figure 4. The influence of locomotion on membrane potential differs depending on mismatch response.**

392 (A) Example membrane potential trace (black) from a neuron during locomotion onset (vertical dashed  
393 line) in the open-loop condition.

394 (B) Average  $V_m$  response to locomotion onset (purple dashed line) for example neuron in A. Shading  
395 indicates SEM over 4 trials.

396 (C) Top: Heatmap of average membrane potential responses to locomotion onset for all L2/3 neurons.  
397 Responses are sorted as in **Figure 2C**, according to the average mismatch response. Gray shading marks  
398 neurons for which we did not have sufficient data in the open-loop condition. Bottom: Average response  
399 across 9 depolarizing mismatch neurons (orange), 4 hyperpolarizing MM neurons (turquoise) and the 8  
400 remaining neurons (gray). Shading indicates SEM over neurons.

401 (D) Average locomotion onset response (0 to 6 s after locomotion onset) plotted against mismatch  
402 response for 21 neurons.

403 (E) Correlation coefficients between locomotion speed and  $V_m$  compared for 12 dMM neurons, 5 hMM  
404 neurons and remaining 5 neurons. \*\*:  $p < 0.01$ , Student's t-test.

405 **(F)** Average cross correlations between membrane potential and locomotion speed (black) or visual flow  
406 speed (gray). Negative time values indicate locomotion/visual speed preceding membrane potential.  
407 Shading indicates SEM over neurons.

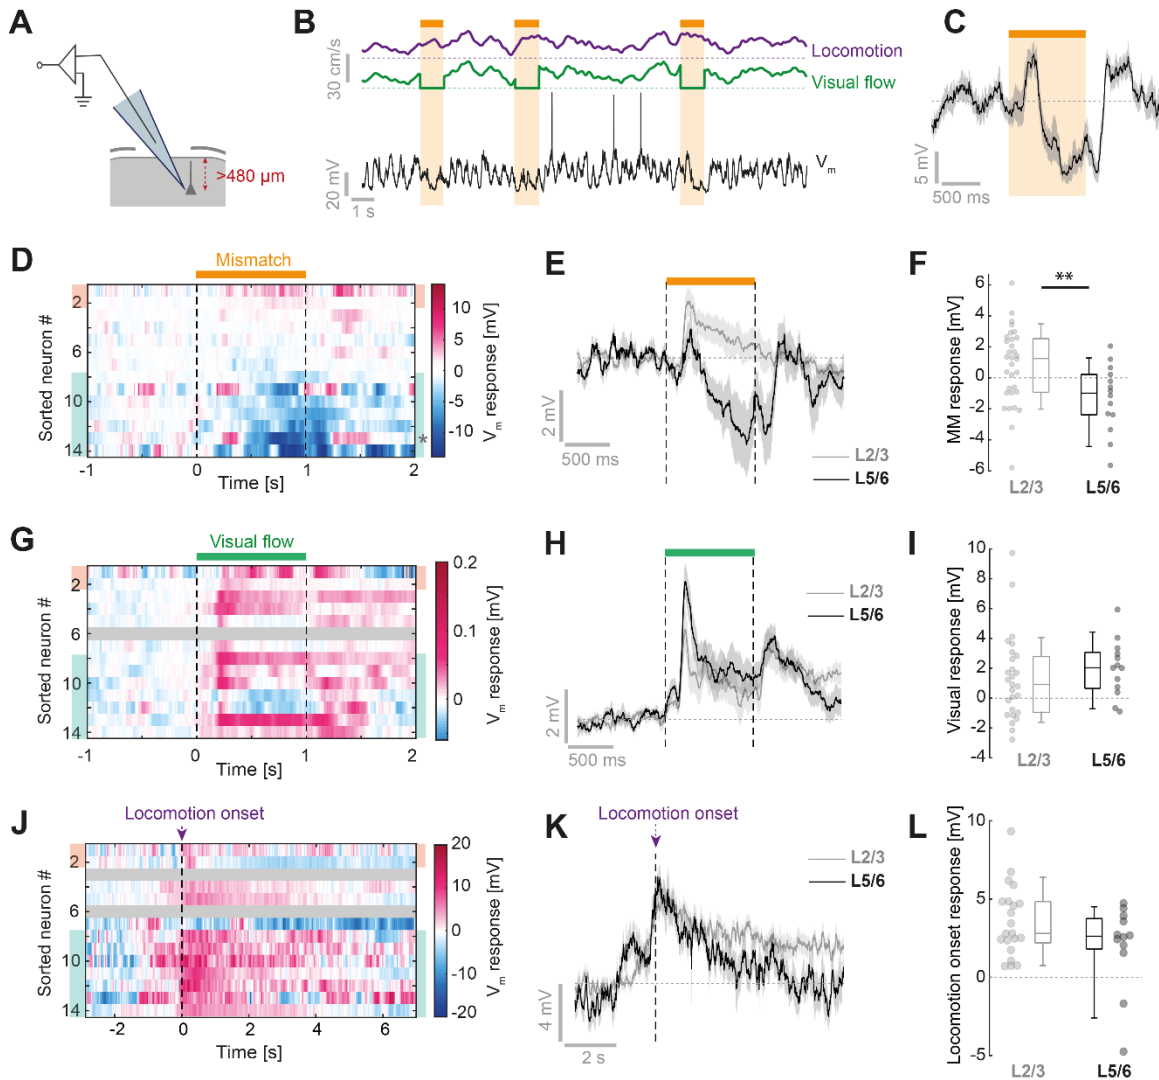

408

409 **Figure 5. Deep layer neurons show lack of depolarizing mismatch responses and visuomotor integration**  
 410 **differs from L2/3 neurons.**

411 (A) Neurons recorded at a vertical depth greater than 480  $\mu\text{m}$  were classified as putative L5/6 neurons.

412 (B) Example membrane potential trace from a putative L5/6 neuron recorded during visuomotor coupling  
 413 with mismatch stimuli (orange bar and shading).

414 (C) Average membrane potential response to mismatch stimulus for the neuron in B. Shading indicates  
 415 SEM over 13 trials.

416 (D) Heatmap of average membrane potential responses to mismatch of all L5/6 neurons. Neurons are  
 417 sorted by average mismatch response.

418 (E) Average response to mismatch across all L5/6 neurons (black, 14 neurons), compared to the average  
 419 response to mismatch across all L2/3 neurons (gray, 32 neurons). Shading indicates SEM over neurons.

- 420 **(F)** Average mismatch responses of L2/3 and L5/6 neurons. \*\*:  $p < 0.01$ , Student's t-test.
- 421 **(G)** As in **D**, but for visual flow responses.
- 422 **(H)** As in **E**, but for visual flow responses.
- 423 **(I)** As in **F**, but for visual flow responses.
- 424 **(J)** As in **D**, but for locomotion onset responses.
- 425 **(K)** As in **E**, but for locomotion onset responses.
- 426 **(L)** As in **F**, but for locomotion onset responses.
- 427

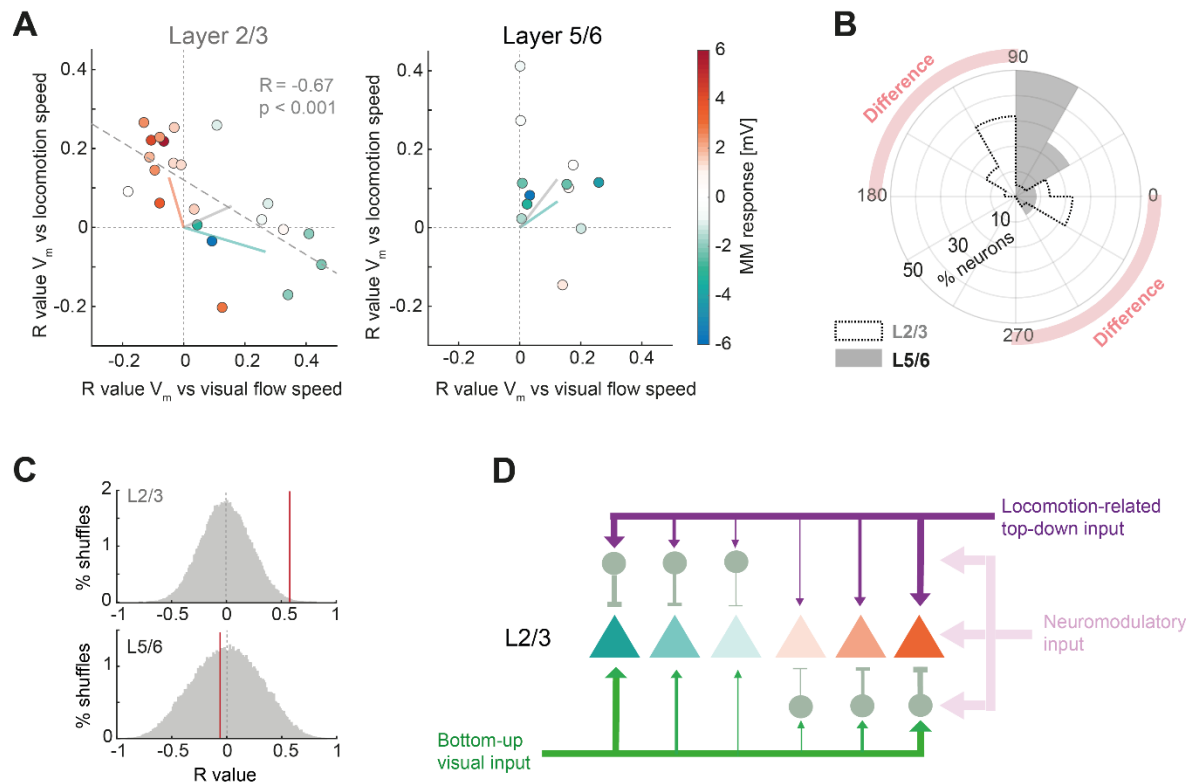

428

429 **Figure 6. L2/3 neurons, but not L5/6 neurons, integrate locomotion and visual inputs with opposing**  
 430 **sign.**

431 (A) Left: Scatter plot of the correlation coefficient between  $V_m$  and visual flow speed, and the correlation  
 432 coefficient between  $V_m$  and locomotion speed for 22 L2/3 neurons. Right: The same for 12 L5/6 neurons.  
 433 Data points are colored by mismatch response. Gray dashed line is a linear regression to the data. Pale  
 434 solid lines indicate average angles for hMM neurons (turquoise), dMM neurons (orange), and remaining  
 435 neurons (gray).

436 (B) Histogram of the angles in A for each neuron. The two histograms are significantly anticorrelated  
 437 compared to shuffled datasets ( $p < 0.02$ , see Methods).

438 (C) The difference between the correlation of membrane potential with visual flow and the correlation of  
 439 membrane potential with locomotion speed is a good predictor of mismatch responses in L2/3 neurons  
 440 ( $R = 0.59$ , vertical red line), but not in L5/6 ( $R = -0.06$ , vertical red line). The gray histograms are shuffle  
 441 controls in which the locomotion and visual flow correlation values are scrambled across neurons.

442 (D) Schematic of hypothesized L2/3 circuit. Excitatory neurons (triangles) in L2/3 have a range of  
 443 responses to visuomotor mismatch from strong depolarization (orange) to strong hyperpolarization  
 444 (green). The strength of this response reflects the balance between feedforward and top-down excitation  
 445 and inhibition for this particular combination of visuomotor inputs. Locomotion causes both direct  
 446 excitatory input and disynaptic feed-forward inhibition (via inhibitory interneurons, in gray), as well as a  
 447 state change that affects neurons via neuromodulatory input. Width of arrows indicates relative strength  
 448 of input.

449 **SUPPLEMENTARY FIGURES**

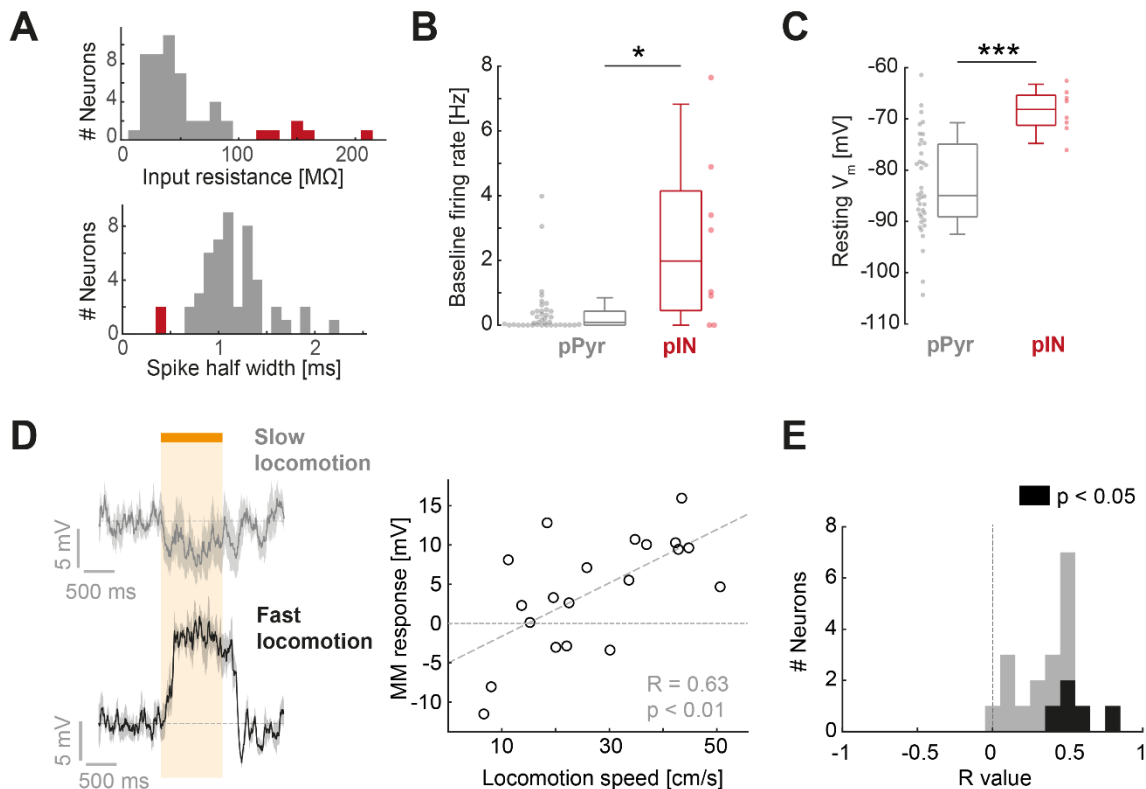

450

451 **Figure S1. Exclusion of putative interneurons and correlations between mismatch responses and**  
 452 **locomotion speed. Related to Figure 1.**

453 **(A)** Distribution of input resistance (top) and spike half-width (bottom) of the entire dataset, regardless of  
 454 recording depth. Marked in red are neurons we excluded as potential interneurons, either based on input  
 455 resistance > 100 MΩ or a spike half-width < 0.6 ms. Neurons excluded using each criterion did not overlap.  
 456 Excluded neurons showed other electrophysiological properties that differed from the remaining dataset  
 457 and were consistent with interneuron properties (see B-C).

458 **(B)** Comparison of baseline firing rate (during stationary periods) for putative excitatory neurons versus  
 459 the excluded putative interneurons. Firing rates for putative interneurons were significantly more variable  
 460 ( $p < 10^{-3}$ , Brown-Forsythe test), and significantly higher than in putative excitatory neurons ( $p < 0.03$ ,  
 461 Wilcoxon rank sum test).

462 **(C)** As in B, but for resting membrane potential. Membrane potentials in putative interneurons were  
 463 significantly less variable ( $p < 0.05$  Bartlett test), and significantly more depolarized than for putative  
 464 excitatory neurons ( $p < 10^{-3}$ , Wilcoxon rank sum test).

465 **(D)** Average mismatch responses from a dMM neuron at different locomotion speeds. Top: Average over  
 466 5 trials with lowest locomotion speed. Bottom: Average over 5 trials with highest locomotion speed.  
 467 Shading indicates SEM. Right: Scatter plot between locomotion speed and mismatch response for the  
 468 same neuron. Gray dashed line indicates the linear regression.

469 (E) Histogram of R values for the correlation between locomotion speed and mismatch response in 19  
470 neurons with more than 10 mismatch trials. In black are neurons with a significant correlation ( $p < 0.05$ ).



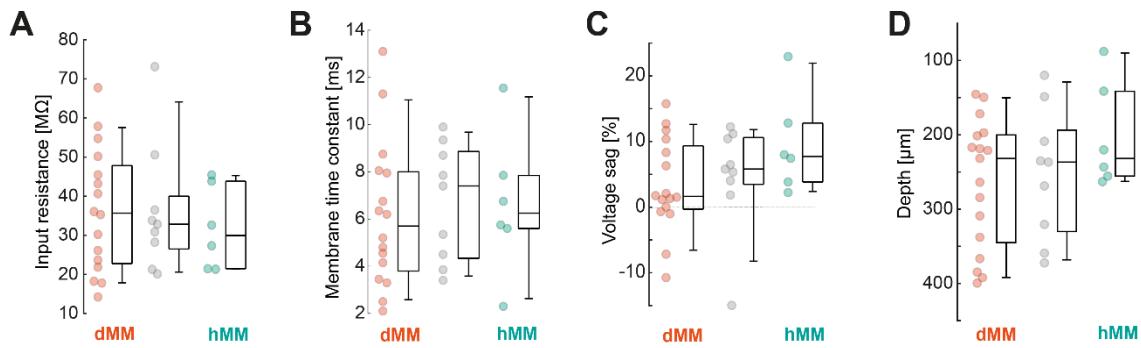

471

472 **Figure S2. Comparison of properties between dMM and hMM neurons. Related to Figure 2.**

473 (A) Input resistances across the three groups of neurons. There was no significant difference between  
474 hMM and dMM groups ( $p = 0.54$ , Student's t-test).

475 (B) Membrane time constants across the three groups of neurons. There was no significant difference  
476 between hMM and dMM groups ( $p = 0.75$ , Student's t-test).

477 (C) Voltage sag during a  $-0.4$  nA current step (a measure of  $I_h$  current) across the three groups of neurons.  
478 Voltage sag was larger in the hMM neurons compared to dMM neurons (likely as a consequence of the  
479 more hyperpolarized resting membrane potentials), though this did not reach significance ( $p = 0.09$ ,  
480 Student's t-test).

481 (D) Vertical depth of recording from brain surface across the three groups. There was no significant  
482 difference between hMM and dMM groups ( $p = 0.06$ , Student's t-test).

483

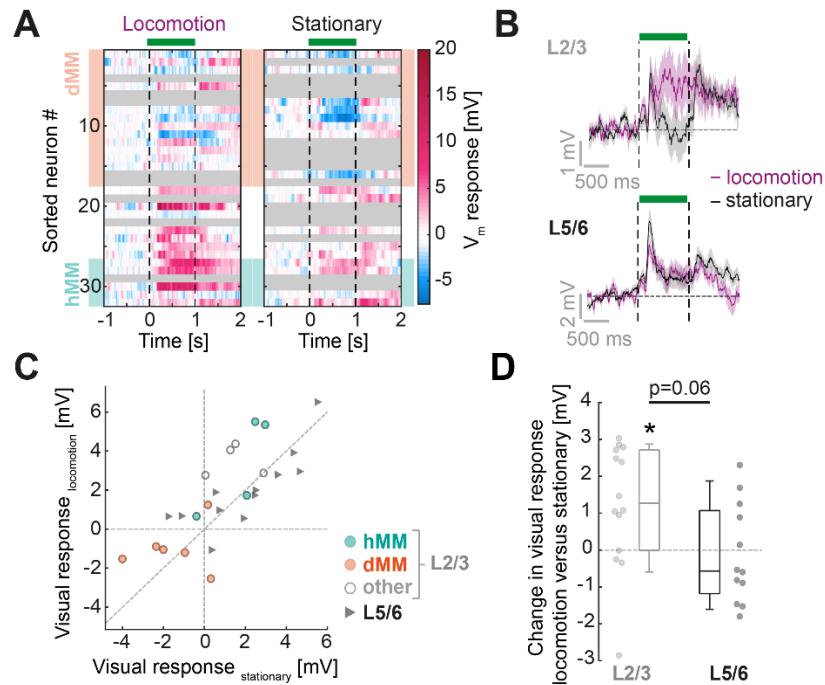

484

485 **Figure S3. Effect of locomotion state on visual flow responses. Related to Figure 3.**

486 (A) Heatmaps of subthreshold visual responses of L2/3 neurons sorted by mismatch response (as in **Figure**  
487 **2C**), during locomotion (left), or during stationary periods (right). Gray marks neurons for which we did  
488 not have at least five visual flow presentations. Orange shading indicates dMM neurons and turquoise  
489 shading indicates hMM neurons.

490 (B) Average visual flow response of L2/3 cells (top) and L5/6 cells (bottom) during locomotion (purple)  
491 and stationary periods (black). Shading shows SEM. Only neurons with at least five trials in each  
492 category were included.

493 (C) Scatter plot of visual flow responses during stationary periods and visual flow responses during  
494 locomotion periods for all neurons with at least five trials in each category.

495 (D) Change in visual flow response between locomotion and stationary periods for L2/3 neurons and  
496 L5/6 neurons. L2/3 neurons showed a significantly more positive responses during locomotion  
497 compared to stationary periods ( $p < 0.02$ , paired t-test). L5/6 neurons did not show this effect ( $p = 0.78$ ,  
498 paired t-test). Changes were higher for L2/3 neurons versus L5/6 neurons ( $p = 0.06$ , Student's t-test).

499

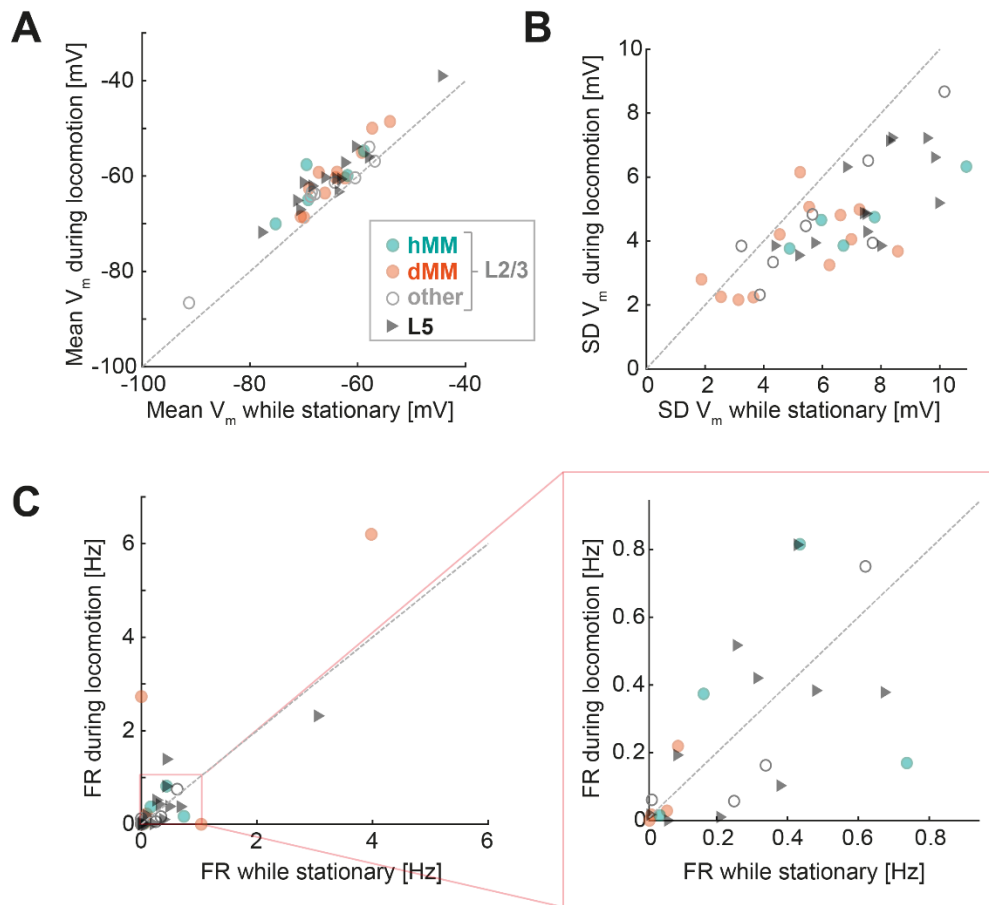

500

501 **Figure S4. Membrane potential dynamics and firing rate changes between stationary periods and**  
502 **locomotion. Related to Figure 4.**

503 (A) Mean membrane potential ( $V_m$ ) during stationary periods versus that during locomotion. All neurons  
504 showed depolarization of membrane potential during locomotion.

505 (B) As in A, but for the standard deviation (SD) in membrane potential.

506 (C) As in A, but for firing rates (FR). Right plot shows an expanded version of the left.

507

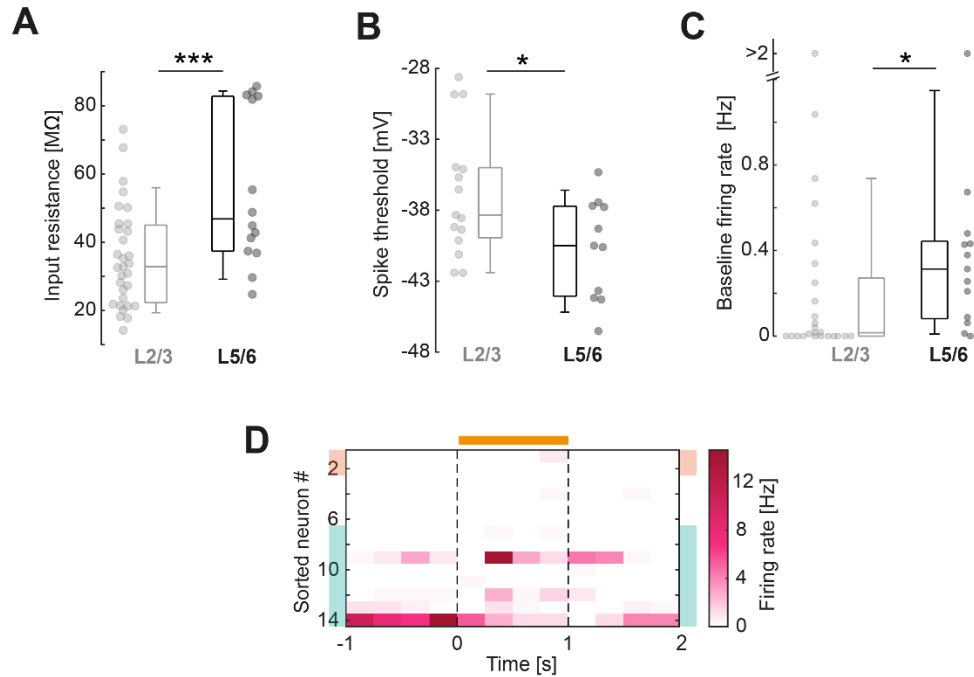

508

509 **Figure S5. Comparison of properties between putative L5/6 and L2/3 excitatory neurons. Related to**  
510 **Figure 5.**

511 (A) Input resistance was significantly higher in L5/6 neurons than in L2/3 neurons ( $p < 10^{-3}$ , Student's t-  
512 test).

513 (B) Spike threshold was significantly higher in L2/3 neurons than in L2/3 neurons ( $p < 0.03$  Student's t-  
514 test).

515 (C) Baseline firing rate was significantly higher in L5/6 neurons than in L2/3 neurons ( $p < 0.03$ , Wilcoxon  
516 rank sum test).

517 (D) Heatmap of average spike counts aligned to mismatch events for L5/6 neurons. Heatmap is sorted  
518 according to subthreshold mismatch responses, as in **Figure 4**.

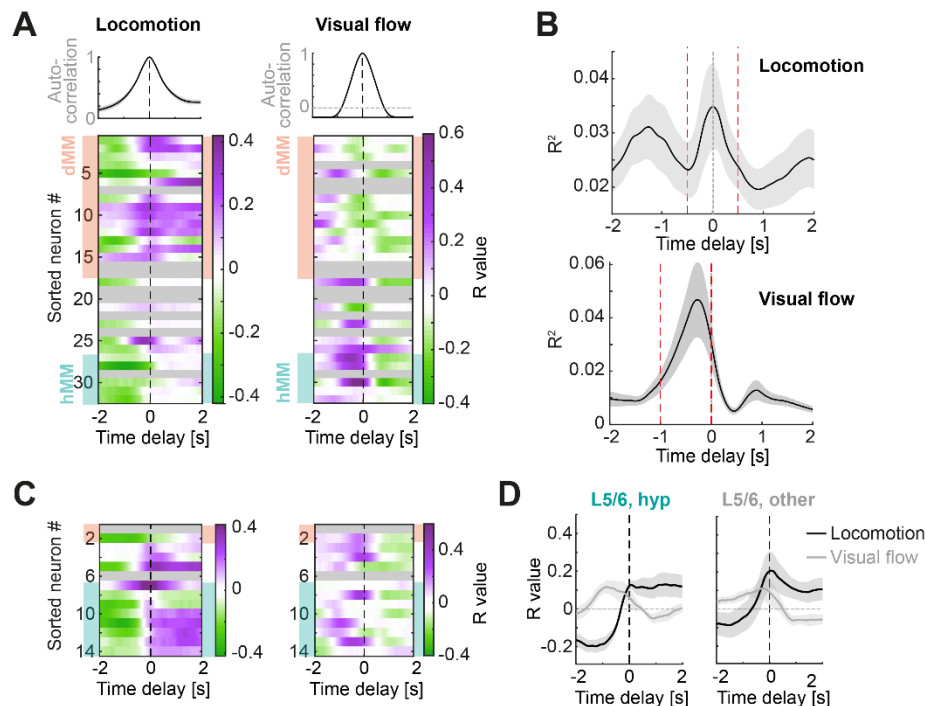

519

520 **Figure S6. Additional data for cross correlations between visual flow, locomotion and membrane**  
 521 **potential. Related to Figure 6.**

522 (A) Top plots: Average autocorrelations for locomotion (left) and visual flow (right). Heatmaps show cross-  
 523 correlations for each L2/3 neuron between locomotion and membrane potential (left), and visual flow  
 524 and membrane potential (right). Heatmaps are sorted by mismatch response as in main figures. All  
 525 analyses excluded stationary periods. Note for all panels, negative time values indicate a lag of  $V_m$  relative  
 526 to locomotion/visual flow. Shading indicates SEM over neurons.

527 (B) Average  $R^2$  for all cross correlations (L5/6 and L2/3 pooled,  $n = 34$ ) for locomotion and  $V_m$  (top) and  
 528 visual flow and  $V_m$  (bottom). Red 1 s window indicates the time delay window used to calculate the  
 529 average R value for each neuron (as plotted in **Figure 6**) – approximately centered around the peak  $R^2$  for  
 530 locomotion and visual flow separately.

531 (C) As in A, but for L5/6 neurons.

532 (D) Average cross correlations between locomotion speed (black) or visual flow speed (gray) and  
 533 membrane potential for the 7 L5/6 neurons which hyperpolarize during mismatch ('hyp'), and the  
 534 remaining 5 neurons ('other', including 2 depolarizing neurons) L5/6 neurons.

## 535   **METHODS**

536   **Animals and surgery.** All animal procedures were approved by and carried out in accordance with  
537   guidelines of the Veterinary Department of the Canton Basel-Stadt, Switzerland. Mice were anesthetized  
538   using a mix of fentanyl (0.05 mg/kg), medetomidine (0.5 mg/kg) and midazolam (5 mg/kg). Analgesics  
539   were applied perioperatively. Lidocaine was injected locally on the scalp (10 mg/kg s.c.) prior to surgery,  
540   while metacam (5 mg/kg, s.c.), and buprenorphine (0.1 mg/kg s.c.) were injected just after completion of  
541   the surgery. An incision was made in the skin above the cranium, and the periosteum completely removed  
542   from the skull. The surface of the skull was roughened with a dental drill. To optimize stability of the brain  
543   for later recordings, a blunt tool was used to apply force to one of the intra-parietal skull plates just  
544   anterior to bregma until small forces applied to either intra-parietal or parietal skull plates did not result  
545   in relative movement of the bones. In this position, layers of tissue glue (Histoacryl, B.Braun, Germany)  
546   were used to fuse the skull plates along the sutures. Tissue glue was then applied to the whole skull  
547   surface, and a custom-made stainless-steel head bar was glued to the skull. At this point, right V1 was  
548   marked at 2 to 3 mm lateral, just anterior to the lambdoid suture. Dental cement was used to fix the head-  
549   bar in place and build a recording chamber around V1. Anesthesia was then antagonized (Flumazenil, 0.5  
550   mg/kg and Atipamezole, 2.5 mg/kg i.p.), and the mouse was allowed to recover for 3 days, with  
551   buprenorphine injected as before on days 1 and 2 following surgery.

552   **Whole cell recordings.** Micropipettes (5 to 8 M $\Omega$ ) were fabricated using a PC-100 puller (Narishige, Tokyo,  
553   Japan) from 1.5 mm diameter filamented borosilicate glass (BF150-86-10, Sutter, California, USA). A small  
554   1 mm craniotomy and durectomy were made over the right primary visual cortex (2-3 mm lateral from  
555   the midline, just anterior to the lambdoid suture) under isoflurane anesthesia. To stabilize the brain, the  
556   craniotomy was then covered in a layer (0.5 - 1 mm) of 4% low-melting point agar (A9793, Sigma-Aldrich),  
557   dissolved in bath recording solution. The recording chamber was then submerged in bath recording  
558   solution (126 mM NaCl, 5 mM KCl, 10 mM HEPES, 2 mM MgSO<sub>4</sub>, 2 mM CaCl<sub>2</sub>, 12 mM glucose, brought to  
559   pH 7.4 using NaOH, with a final osmolarity 280-290 mOsm). The mouse was allowed to recover from  
560   isoflurane anesthesia for at least 20 minutes head-fixed prior to recordings, which were only attempted  
561   after the mouse had displayed regular locomotion behavior. Whole cell recordings were performed blindly  
562   by lowering the micropipette, back-filled with intracellular recording solution (135 mM KMeSO<sub>3</sub>, 5 mM  
563   KCl, 0.1 mM EGTA, 10 mM HEPES, 4 mM Mg-ATP, 0.5 mM Na<sub>2</sub>-GTP, 4 mM Na<sub>2</sub>-phosphocreatine, brought  
564   to pH 7.3-7.4 with KOH, with an osmolarity 284 to 288 mOsm), through the agar and 50  $\mu$ m into the tissue  
565   with high pressure (>500 mbar) applied to the micropipette. Micropipette resistance was monitored in

566 voltage clamp via observing the electrode current while applying 15 mV square pulses at 20 Hz. Brain  
567 entry was detected by a step change in the current (Margrie et al., 2002), and at this point the descent  
568 axis was zeroed. Once a depth of 50  $\mu\text{m}$  from the surface was reached, pipette pressure was lowered to  
569 20 mbar and neuron hunting began. This consisted of advancing the electrode in 2  $\mu\text{m}$  steps until a  
570 substantial and progressive increase in pipette resistance was observed for at least 3 consecutive steps.  
571 Pressure in the pipette was then rapidly lowered to 0 mbar, and often a small negative pressure was  
572 applied to aid in forming a gigaohm seal. Once this was achieved, the pipette was then carefully retracted  
573 by up to 4  $\mu\text{m}$ , and break-in achieved using suction pulses. Electrophysiological properties were  
574 determined in the first 60 s of the recording using a series of current steps from -0.4 to 0.3 nA, and the  
575 evoking of action potentials was used to confirm the neuronal nature of the cell. All recordings took place  
576 in current clamp mode. Recordings were terminated if series resistance displayed a substantial increase,  
577 as monitored by 25 ms current pulses between -0.1 and -0.25 nA applied at 1 Hz throughout the recording.  
578 Pipette capacitance and series resistance were not compensated. Data were acquired and Bessel low-pass  
579 filtered below 4 kHz using a MultiClamp amplifier (Molecular Devices, California USA) and digitized at 20  
580 kHz via custom written LabView software. A junction potential of -8.5 mV was measured for our solutions,  
581 and all values reported in the manuscript have been corrected for this. On average, there was an access  
582 resistance of  $58 \pm 22 \text{ M}\Omega$ , and a recording duration of  $14 \pm 5$  minutes.

583 **Virtual reality.** During all recordings, mice were head-fixed in a virtual reality system as described  
584 previously (Leinweber et al., 2014). Briefly, mice were free to run on an air-supported polystyrene ball,  
585 the rotation of which was coupled to linear displacement in the virtual environment projected onto a  
586 toroidal screen surrounding the mouse. From the point of view of the mouse, the screen covered a visual  
587 field of approximately 240 degrees horizontally and 100 degrees vertically. The virtual environment  
588 presented on the screen was a virtual tunnel with walls consisting of continuous vertical sinusoidal  
589 gratings. Prior to the recording experiments, mice were trained in 1 to 2-hour sessions for 5 to 7 days,  
590 until they displayed regular locomotion.

591 **Visual stimuli.** During the first segment of each recording, visual flow feedback was coupled to mouse's  
592 locomotion speed. At random intervals averaging at 7 s, 1 s long pauses in visual feedback were presented  
593 (referred to as 'mismatch' stimuli). After at least 3 minutes of this protocol, the visual feedback was  
594 stopped (i.e. no visual flow coupled to locomotion speed), and instead 1 s full-field fixed-speed visual flow  
595 stimuli were presented at random intervals (mean  $\pm$  SD,  $8.1 \pm 1.3$  s), regardless of locomotion behavior.

596 In a subset of recordings (12 of 27), these stimuli all had one fixed visual flow speed, and in the remaining  
597 subset (15 of 27), four different visual flow speeds were presented in a pseudorandom sequence.

598 **Data Analysis.** All data analysis was performed using custom written Matlab 2019a (Mathworks) code.

599 **Comparison statistics:** For each unpaired two-sample comparison, first a Lilliefors test was used to test  
600 whether the distribution was normal. If so, a Bartlett test was used to determine whether the two samples  
601 had an equal variance. If both conditions were satisfied ( $p > 0.05$ ), a Student's t-test was used to determine  
602 whether there was a significant difference between the two groups. If either condition was violated, a  
603 Wilcoxon rank-sum test was used instead. To test for significant differences in variance in non-normally  
604 distributed samples, a Brown-Forsythe test was performed. Box and whisker plots are all drawn such that  
605 the box represents the inter-quartile range and median, and the whiskers represent the 10<sup>th</sup> and 90<sup>th</sup>  
606 percentiles. For correlations, as in **Figures 3E, 4D** and **6A**, a method of fitting robust to outliers was used  
607 (Matlab function Fitlm) based on bisquare weighting of residuals.

608 **Cell numbers:** In total, we recorded from 54 neurons. Of these, 6 neurons were excluded as putative  
609 interneurons, as they had an input resistance higher than 100 M $\Omega$ . A subset of interneuron types (e.g.  
610 somatostatin-expressing neurons) have been described to have high input resistances. Two neurons were  
611 excluded due to spike half-widths below 0.6 ms (putative parvalbumin-expressing neurons). Consistent  
612 with the excluded neurons being interneurons, other electrophysiological features differed between  
613 these excluded neurons and the remaining putative excitatory neurons, including higher baseline spike  
614 rates, more depolarized resting membrane potential and lower spike thresholds (**Figure S1**). 32 of the  
615 remaining 46 putative excitatory neurons were recorded at a vertical depth of less than 400  $\mu\text{m}$  below  
616 the brain surface. We refer to these as putative L2/3 neurons. Of these, 28 underwent both the  
617 visuomotor coupled and open-loop parts of the protocol, and the remaining 4 underwent only the former  
618 part. Of the 28 neurons with both parts of the protocol, 16 were presented with visual stimuli of four  
619 different speeds, while the remaining 12 were presented with only one visual flow speed. The neurons for  
620 which we do not have data in the open-loop condition are represented as uniform gray on response  
621 heatmaps of visual flow and locomotion onset response. 14 neurons were recorded at vertical depths  
622 lower than 480  $\mu\text{m}$ , with a maximum depth of 723  $\mu\text{m}$ . We refer to these as putative L5/6 neurons. Of  
623 these, 13 underwent both the visuomotor coupled and open-loop parts of the protocol, and the remaining  
624 1 underwent only the former part. Of the 13 neurons with both parts of the protocol, 12 were presented  
625 with four different visual flow stimuli of different speeds, and the remaining 1 was presented visual flow  
626 stimuli of one speed only.



627 **Electrophysiological properties:** A series of current steps from -0.4 to 0.3 nA were applied to the neuron  
628 at least 3 times at the beginning of the recording to determine input resistance. The total resistance was  
629 calculated by averaging the voltage response for each current step value and measuring the slope  
630 between the average response 25-125 ms after current step onset against the injected current. This was  
631 done separately for negative and positive current injection, as the former consistently showed a lower  
632 resistance than the latter (in part due to voltage sag during negative current injection). Next, access  
633 resistance was calculated by taking the slope between the current injected and the voltage response in  
634 the first 1 ms. Input resistance was calculated as the difference between total resistance and access  
635 resistance. Resting membrane potential was defined where the current-voltage slope crossed the voltage-  
636 axis (at zero current). Note that resting membrane potential would often depolarize by a few mV before  
637 stabilizing during the first 3-5 minutes of the recording, presumably as the intracellular solution diffuses  
638 throughout the neuron. As such, membrane voltages read out at later time points (e.g. in **Figure S4**) are  
639 different to the resting membrane potential assessed just after break-in. Voltage sag was calculated as  
640 the difference in the average voltage response to a -0.4 nA step 15 to 25 ms after current step onset and  
641 150 to 250 ms after onset. Note that holding voltage was not controlled, so resting membrane potential  
642 differences account for some of the variance ( $R^2 = 0.24$ ) in the voltage sag measurement. The membrane  
643 time constant was estimated by finding the time at which the voltage change first exceeded  $1-1/e$  of the  
644 difference between 1 ms after current step (-0.1 nA) onset and steady state (estimated as the voltage in  
645 the window 45-50 ms after the onset).

646 **Spike properties and subtraction:** Spikes were detected from peaks exceeding -30 mV during zero current  
647 application from across the entire recording. Spikes with an amplitude less than 30 mV were rejected. The  
648 remaining spikes were then averaged together to get an average spike waveform. The spike threshold  
649 was determined as the voltage value of the average spike waveform at the time of the peak rate of change  
650 of the slope of the spike waveform. Spike amplitude was measured as the difference between value of  
651 the peak of the spike and that of the threshold. For spike threshold analysis, only naturally occurring spikes  
652 were included in the analysis, and not the spikes evoked during current injection. Thus, for silent neurons  
653 these values are missing. Spike half-width was then measured as the duration the average spike waveform  
654 exceeded half of the spike amplitude. For all average membrane potential response plots, spikes were  
655 removed from membrane potential traces by replacing them with a linear interpolation from the  
656 membrane potential recorded 2 ms prior to spike peak, and that recorded 3 ms after spike peak. Voltage  
657 responses to the 25 ms current pulses used to track access resistance were removed similarly, by replacing  
658 them with a linear interpolation from the time just before the current pulse turned on to that 70 ms later.

659 **Mismatch responses:** Presentation of visual flow halts were independent of locomotion speed. As only  
660 halts during non-zero visual flow speed would result in a change, mismatch events were defined as visual  
661 flow halts that occurred during an average locomotion speed exceeding 4 cm/s in the 1 s prior to and  
662 during mismatch stimulus. To calculate average  $V_m$  responses, spikes and current pulses were subtracted  
663 as described above and the average voltage in a window 1 s prior to mismatch was subtracted from the  
664  $V_m$  for each trial. The mean of all resulting  $V_m$  traces was then taken to generate the average response.  
665 The average response for each neuron was taken as the mean  $V_m$  response during the entire 1 s of  
666 mismatch presentation. The significance of this response was determined by performing a paired  
667 Student's t-test between the average  $V_m$  1 s before mismatch, and that in the 1 s during mismatch for all  
668 included trials. Spiking responses were computed based on the same mismatch events and generated by  
669 taking the mean spike count in 250 ms time bins aligned to mismatch onset.

670 **Locomotion dynamics and correlations with  $V_m$ :** To measure membrane potential average and variance,  
671 as well as spiking activity during locomotion and stationary periods (**Figure S4**), only the data from the  
672 open-loop condition was used. The data was binned into 500 ms time bins, and the spike count, median  
673 membrane potential and locomotion speed were calculated for each time bin. The locomotion speed trace  
674 was smoothed in a 1 s time window prior to this calculation. For quantification of  $V_m$  during stationary  
675 periods, all  $V_m$  values corresponding to times when the locomotion speed was below a threshold of 4 cm/s  
676 were pooled, and the mean and standard deviation of these values were calculated for each neuron. The  
677 same was then done for locomotion periods where the locomotion speed exceeded the 4 cm/s threshold.

678 **Calculation of cross correlations (Figures 4E, 4F and S6):** Cross correlations were calculated between  
679 membrane potential and locomotion for the open-loop condition only. For this, the locomotion trace and  
680 visual flow trace recorded at 1 kHz were smoothed using a 500 ms time window. Membrane potential was  
681 binned in 1 ms time windows. Times when the mouse was stationary (locomotion < 4 cm/s), and times  
682 where visual flow stimuli were presented (as well as 1 s after the presentation) were excluded. We then  
683 computed the cross-correlation between locomotion trace and membrane potential in a window of -2000  
684 to +2000 ms. A similar procedure was used for the cross correlation between membrane potential and  
685 visual flow, again excluding periods when the mouse was stationary. For each neuron, the overall  
686 correlation coefficient for the Locomotion- $V_m$  correlation was taken as the average correlation for time  
687 delays between -500 and +500 ms, as this is where the cross correlation averaged across the L2/3 and  
688 L5/6 samples combined peaked (**Figure S6B**). For each neuron, the overall correlation coefficient for the  
689 visual flow- $V_m$  correlation was taken as the average correlation for time delays between -1000 and 0 ms,

690 as this is where the cross correlation averaged across the L2/3 and L5/6 samples combined peaked (**Figure**  
691 **S6B**). Only neurons with at least 25 s of locomotion in absence of visual flow were included in these  
692 analyses (n = 22 L2/3, n = 12 L5/6).

693 To compare correlations for L5/6 and L2/3 datasets (**Figure 6**), we calculated an interaction angle for each  
694 neuron as the arcus tangent of the ratio of the locomotion- $V_m$  correlation to the visual flow- $V_m$  correlation.  
695 Polar histograms were then made for the L2/3 and L5/6 datasets separately (**Figure 6B**). The neuron  
696 counts for each time bin were then correlated between L5/6 and L2/3 datasets, generating an R value of  
697 -0.11. To test if this anticorrelation was significant, L5/6 and L2/3 angles were pooled, and random subsets  
698 corresponding to the sample sizes of the L5/6 and L2/3 datasets were drawn out. An R value was then  
699 calculated for the correlation between the resulting two polar histograms. This was repeated 10000 times  
700 to generate a distribution of R values. Only 0.6 % of the distribution had a negative R value below -0.11.

701 To determine how well the correlations for visual flow speed and locomotion speed predicted a neuron's  
702 mismatch response (**Figure 6C**), we computed the correlation between the difference of the two R values  
703 ( $R_{\text{value}_{\text{locomotion}}} - R_{\text{value}_{\text{visual}}}$ ) and the mismatch responses, for L2/3 and L5/6 neurons separately. As a  
704 shuffle control, we then randomly permuted the visual flow correlation and locomotion correlation values  
705 across neurons 100000 times to create a shuffle distribution.

706 **Visual responses:** Visual onsets were defined as the visual flow trace crossing a threshold of 0.8 cm/s.  
707 For average visual responses, the membrane potential for each presentation was baseline subtracted by  
708 the average  $V_m$  in the 1 s prior to visual flow onset. The response was then averaged across all trials,  
709 regardless of locomotion behavior. For the subset of neurons which were shown four different visual flow  
710 speeds, responses were averaged regardless of visual flow speed. To determine the effect of locomotion  
711 on visual flow responses (**Figure S3**), visual flow presentations were separated according to locomotion  
712 speed: locomotion trials were defined as trials in which the average locomotion speed in the 1s prior and  
713 1 s during visual flow both exceeded 4 cm/s. Stationary trials were defined as trials in which the  
714 locomotion speed in these two epochs both were less than 4 cm/s. For correlations between visual flow  
715 speed and visual response, only trials in which the mouse was locomoting above 0.8 cm/s were included,  
716 and an R value for the correlation between the visual flow speed and membrane potential response across  
717 trials was generated for each neuron.

718 **Correlation between visual flow response and mismatch response:** For the correlation between  
719 mismatch response and visual response across cells (**Figure 3E**), we first calculated the correlation

720 between the mismatch response (as averaged across the 1 s of mismatch) versus the visual response (as  
721 averaged across the 1 s of visual response). To account for any response to visual flow offset, we took the  
722 visual offset response as the average membrane potential response in the 1 s after visual flow offset,  
723 normalized to the average membrane potential in the 1 s prior to visual flow onset. This visual flow offset  
724 response was then subtracted from the mismatch response, and the correlation was calculated between  
725 the resulting values and the visual flow response.

726 **Locomotion onset responses:** Locomotion velocity was first smoothed using a 1 s time window. To  
727 determine the time of locomotion onsets, we detected where the smoothed locomotion velocity crossed  
728 a threshold of 0.8 cm/s. We then excluded any onsets where the smoothed locomotion velocity 1 s prior  
729 exceeded 2.5 cm/s, and the velocity 1 s after onset was less than 2.5 cm/s. Average locomotion onset  
730 responses were then calculated for each neuron where there were at least 2 locomotion onsets. These  
731 were normalized by subtracting the average membrane potential in the 2.5 s prior to locomotion onset  
732 for each trial before averaging all traces. Locomotion onset responses were taken for each neuron as the  
733 average response 0-6 s after locomotion onset.

#### 734 **ACKNOWLEDGEMENTS**

735 We thank Rainer Friedrich, Mahesh Karnani, Jesse Jackson, Loreen Hertäg and Andreas Keller for helpful  
736 discussion and comments on earlier versions of this manuscript. We thank Andreas Lüthi for lending us  
737 research equipment, and all the members of the Keller lab for discussion and support. This project has  
738 received funding from the Swiss National Science Foundation (GBK), the Novartis Research Foundation  
739 (GBK&RJ), the Human Frontier Science Program (RJ), and the European Research Council (ERC) under the  
740 European Union's Horizon 2020 research and innovation programme (grant agreement No 865617) (GBK).

#### 741 **AUTHOR CONTRIBUTIONS**

742 RJ designed and performed the experiments and analyzed the data. Both authors wrote the manuscript.

743 **REFERENCES**

- 744 Attinger, A., Wang, B., and Keller, G.B. (2017). Visuomotor Coupling Shapes the Functional Development  
745 of Mouse Visual Cortex. *Cell* *169*, 1291-1302.e14.
- 746 Ayaz, A., Stäuble, A., Hamada, M., Wulf, M.A., Saleem, A.B., and Helmchen, F. (2019). Layer-specific  
747 integration of locomotion and sensory information in mouse barrel cortex. *Nat. Commun.* *10*, 1–14.
- 748 Bennett, C., Arroyo, S., and Hestrin, S. (2013). Subthreshold mechanisms underlying state-dependent  
749 modulation of visual responses. *Neuron* *80*, 350–357.
- 750 Busse, L., Cardin, J.A., Chiappe, M.E., Halassa, M.M., McGinley, M.J., Yamashita, T., and Saleem, A.B.  
751 (2017). Sensation during active behaviors. *J. Neurosci.* *37*, 10826–10834.
- 752 Crapse, T.B., and Sommer, M.A. (2008). Corollary discharge across the animal kingdom. *Nat. Rev. Neurosci.*  
753 *9*, 587–600.
- 754 Engel, A.K., Fries, P., and Singer, W. (2001). Dynamic predictions: Oscillations and synchrony in top–down  
755 processing. *Nat. Rev. Neurosci.* *2*, 704–716.
- 756 Fiser, A., Mahringer, D., Oyibo, H.K., Petersen, A. V, Leinweber, M., and Keller, G.B. (2016). Experience-  
757 dependent spatial expectations in mouse visual cortex. *Nat. Neurosci.* *19*, 1658–1664.
- 758 Fu, Y., Tucciarone, J.M., Espinosa, J.S., Sheng, N., Darcy, D.P., Nicoll, R.A., Huang, Z.J., and Stryker, M.P.  
759 (2014). A cortical circuit for gain control by behavioral state. *Cell* *156*, 1139–1152.
- 760 Gentet, L.J., Kremer, Y., Taniguchi, H., Huang, Z.J., Staiger, J.F., and Petersen, C.C.H. (2012). Unique  
761 functional properties of somatostatin-expressing GABAergic neurons in mouse barrel cortex. *Nat.*  
762 *Neurosci.* *15*, 607–612.
- 763 Harris, K.D., and Mrsic-Flogel, T.D. (2013). Cortical connectivity and sensory coding. *Nature* *503*, 51–58.
- 764 Ibrahim, L.A., Mesik, L., Ji, X. ying, Fang, Q., Li, H. fu, Li, Y. tang, Zingg, B., Zhang, L.I., and Tao, H.W. (2016).  
765 Cross-Modality Sharpening of Visual Cortical Processing through Layer-1-Mediated Inhibition and  
766 Disinhibition. *Neuron* *89*, 1031–1045.
- 767 Iurilli, G., Ghezzi, D., Olcese, U., Lassi, G., Nazzaro, C., Tonini, R., Tucci, V., Benfenati, F., and Medini, P.  
768 (2012). Sound-driven synaptic inhibition in primary visual cortex. *Neuron* *73*, 814–828.
- 769 Keller, G.B., and Mrsic-Flogel, T.D. (2018). Predictive Processing: A Canonical Cortical Computation.

- 770 Neuron *100*, 424–435.
- 771 Keller, A.J., Roth, M.M., and Scanziani, M. (2020). Neurons in Visual Cortex are Driven by Feedback  
772 Projections when their Feedforward Sensory Input is Missing. *BioRxiv* 1–37.
- 773 Keller, G.B., Bonhoeffer, T., and Hübener, M. (2012). Sensorimotor mismatch signals in primary visual  
774 cortex of the behaving mouse. *Neuron* *74*, 809–815.
- 775 De Kock, C.P.J., and Sakmann, B. (2009). Spiking in primary somatosensory cortex during natural whisking  
776 in awake head-restrained rats is cell-type specific. *Proc. Natl. Acad. Sci. U. S. A.* *106*, 16446–16450.
- 777 Larsen, R.S., Turschak, E., Daigle, T., Zeng, H., Zhuang, J., and Waters, J. (2018). Activation of  
778 neuromodulatory axon projections in primary visual cortex during periods of locomotion and pupil  
779 dilation. *BioRxiv* 502013.
- 780 Lefort, S., Tamm, C., Floyd Sarria, J.-C., and Petersen, C.C.H. (2009). The Excitatory Neuronal Network of  
781 the C2 Barrel Column in Mouse Primary Somatosensory Cortex. *Neuron* *61*, 301–316.
- 782 Leinweber, M., Zmarz, P., Buchmann, P., Argast, P., Hübener, M., Bonhoeffer, T., and Keller, G.B. (2014).  
783 Two-photon calcium imaging in mice navigating a virtual reality environment. *J. Vis. Exp.* e50885.
- 784 Leinweber, M., Ward, D.R., Sobczak, J.M., Attinger, A., and Keller, G.B. (2017). A Sensorimotor Circuit in  
785 Mouse Cortex for Visual Flow Predictions. *Neuron* *95*, 1420-1432.e5.
- 786 Makino, H., and Komiyama, T. (2015). Learning enhances the relative impact of top-down processing in  
787 the visual cortex. *Nat. Neurosci.* *18*, 1116–1122.
- 788 Margrie, T.W., Brecht, M., and Sakmann, B. (2002). In vivo, low-resistance, whole-cell recordings from  
789 neurons in the anaesthetized and awake mammalian brain. *Pflugers Arch. Eur. J. Physiol.* *444*, 491–498.
- 790 McFarland, J.M., Bondy, A.G., Saunders, R.C., Cumming, B.G., and Butts, D.A. (2015). Saccadic modulation  
791 of stimulus processing in primary visual cortex. *Nat. Commun.* *6*, 1–14.
- 792 Niell, C.M., and Stryker, M.P. (2010). Modulation of visual responses by behavioral state in mouse visual  
793 cortex. *Neuron* *65*, 472–479.
- 794 Pala, A., and Petersen, C.C.H. (2015). InVivo Measurement of Cell-Type-Specific Synaptic Connectivity and  
795 Synaptic Transmission in Layer 2/3 Mouse Barrel Cortex. *Neuron* *85*, 68–75.
- 796 Polack, P.-O., Friedman, J., and Golshani, P. (2013). Cellular mechanisms of brain state-dependent gain

- 797 modulation in visual cortex. *Nat. Neurosci.* *16*, 1331–1339.
- 798 Rao, R.P.N., and Ballard, D.H. (1999). Predictive coding in the visual cortex: a functional interpretation of  
799 some extra-classical receptive-field effects. *Nat. Neurosci.* *2*, 79–87.
- 800 Rasmussen, R., Nicholas, E., Petersen, N.C., Dietz, A.G., Xu, Q., Sun, Q., and Nedergaard, M. (2019). Cortex-  
801 wide Changes in Extracellular Potassium Ions Parallel Brain State Transitions in Awake Behaving Mice. *Cell*  
802 *Rep.* *28*, 1182-1194.e4.
- 803 Sakata, S., and Harris, K.D. (2009). Laminar Structure of Spontaneous and Sensory-Evoked Population  
804 Activity in Auditory Cortex. *Neuron* *64*, 404–418.
- 805 Saleem, A.B., Ayaz, A., Jeffery, K.J., Harris, K.D., and Carandini, M. (2013). Integration of visual motion and  
806 locomotion in mouse visual cortex. *Nat. Neurosci.* *16*, 1864–1869.
- 807 Saleem, A.B., Diamanti, E.M., Fournier, J., Harris, K.D., and Carandini, M. (2018). Coherent encoding of  
808 subjective spatial position in visual cortex and hippocampus. *Nature* *562*, 124–127.
- 809 Schultz, W., Dayan, P., and Montague, P.R. (1997). A neural substrate of prediction and reward. *Science*  
810 *275*, 1593–1599.
- 811 Spratling, M.W. (2008). Predictive coding as a model of biased competition in visual attention. *Vision Res.*  
812 *48*, 1391–1408.
- 813 Spratling, M.W., De Meyer, K., and Kompass, R. (2009). Unsupervised learning of overlapping image  
814 components using divisive input modulation. *Comput. Intell. Neurosci.* 381457.
- 815 Vélez-Fort, M., Bracey, E.F., Keshavarzi, S., Rousseau, C. V, Cossell, L., Lenzi, S.C., Strom, M., and Margrie,  
816 T.W. (2018). A Circuit for Integration of Head- and Visual-Motion Signals in Layer 6 of Mouse Primary  
817 Visual Cortex. *Neuron* *98*, 179-191.e6.
- 818 Zhang, S., Xu, M., Kamigaki, T., Hoang Do, J.P., Chang, W.-C., Jenvay, S., Miyamichi, K., Luo, L., and Dan, Y.  
819 (2014). Selective attention. Long-range and local circuits for top-down modulation of visual cortex  
820 processing. *Science* *345*, 660–665.
- 821 Zmarz, P., and Keller, G.B. (2016). Mismatch Receptive Fields in Mouse Visual Cortex. *Neuron* *92*, 766–  
822 772.
- 823
